# Supplementary material for: Network Pharmacology-Based Strategy for the Investigation of the Anti-Obesity Effects of an Ethanolic Extract of Zanthoxylum bungeanum Maxim
Source: Front Pharmacol. 2020 Nov 13;11:572387. doi: 10.3389/fphar.2020.572387 (PMC7751641; doi:10.3389/fphar.2020.572387)
Supplement: Supplementary file 4 [file Table2_v1.XLSX]

## Sheet: Sheet1
Supplementary Table S2 | Candidate ingredients in ZBM.
Name	CAS
(3R,6R)-6-ethenyl-2,2,6-trimethyloxan-3-ol	11063-77-7
(1S,2S)-2-isopropenyl-4-isopropylidene-1-methyl-1-vinylcyclohexane	29873-99-2
(L)-alpha-Terpineol	10482-56-1
(3R)-3,7,11-trimethyldodeca-1,6,10-trien-3-ol	142-50-7
1,8-cineole	470-82-6
geraniol	624-15-7
o-Acetyltoluene	577-16-2
(1S,5S)-pin-2-ene	7785-26-4
4-isopropylcyclohex-2-en-1-one	500-02-7
(1S,5S)-6,6-dimethyl-2-methylene-norpinane	18172-67-3
(E)-linalool oxide acetate pyr	23007-29-6
linalyl anthranilate	7149-26-0
(2S)-3-methoxypropane-1,2-diol	71484-94-1
cis-Pinene hydrate	17974-51-5
CLOVENE	469-92-1
[(3S,6E)-3,7,11-Trimethyldodeca-1,6,10-trien-3-yl] acetate	56001-43-5
dymel A	115-10-6
ledol	577-27-5
zoomaric acid	373-49-9
L-Bornyl acetate	6626-35-3
myrcene	123-35-3
(R)-linalool	126-91-0
moslene	99-85-4
(6R)-6-isopropyl-3-methyl-1-cyclohex-2-enone	4573-50-6
methyleugenol	6380-24-1
benzoic acid	65-85-0
beta-Gurjunene	73464-47-8
(4S)-4-isopropenyl-1-methyl-cyclohexene	5989-54-8
terragon	140-67-0
cis-Anethol	25679-28-1
alpha-humulene	19132-75-3
(1S,4R)-2,2-dimethyl-3-methylene-norbornane	79-92-5
eugenol	97-53-0
skimmetin	93-35-6
(3R)-3-isopropyl-6-methylene-cyclohexene	6153-17-9
beta-Cubebene	13744-15-5
skimmianin	83-95-4
(1S,5S)-1-isopropyl-4-methylenebicyclo[3.1.0]hexane	87-41-5
diosmetin	520-34-3
beta-Selinene	17066-67-0
(1S,4aR,8aS)-1-isopropyl-4,7-dimethyl-1,2,4a,5,8,8a-hexahydronaphthalene	523-47-7
T-Muurolol	19912-62-0
spathulenol	6750-60-3
anizol	100-66-3
beta-sitosterol	83-46-5
beta-caryophyllene	8007-38-3
(1R,4aS,8aS)-7-methyl-4-methylidene-1-propan-2-yl-2,3,4a,5,6,8a-hexahydro-1H-naphthalene	39029-41-9
hyperoside/Hyperin	482-36-0
otan	96-26-4
azeton	67-64-1
herniarin/Ayapanin	531-59-9
anethole	12002-40-3
1-alpha-Terpinyl acetate	58206-95-4
3-methylhexane	589-34-4
diosmin	520-27-4
3,4,5-trihydroxybenzoic acid	149-91-7
suberosin	581-31-7
(1S)-4-methyl-1-propan-2-ylcyclohex-3-en-1-ol	2438-10-0
delta-amorphene	483-76-1
oleic acid	17156-84-2
palmitic acid	67701-02-4
(5R)-2-methyl-5-propan-2-ylcyclohexa-1,3-diene	4221-98-1
ascaridole	512-85-6
butenone	78-94-4
cineole	470-82-6
(1S,2S,4R)-2,4-diisopropenyl-1-methyl-1-vinyl-cyclohexane	122-78-1
terpilene	99-86-5
(1R,6S)-3,7,7-trimethylbicyclo[4.1.0]hept-3-ene	20296-50-8
(1S,6R)-4,7,7-trimethylbicyclo[4.1.0]hept-4-ene	554-61-0
cuminal	122-03-2
quercetin	117-39-5
rutin	153-18-4
sanshool	504-97-2
N-benzoyltyramine	41859-54-5
Hydroxy-α-sanshool	83883-10-7
γ-sanshool	78886-65-4
zanthosimuline	155416-20-9
tamarixetin	603-61-2
simulansine	176520-66-4
tambulin	571-72-2
hydroxy-β-sanshool	97465-69-5
hydroxy-γ-sanshool	78886-66-5
limonene	138-86-3
linalool	78-70-6
