# Supplementary material for: Network Pharmacology-Based Strategy for the Investigation of the Anti-Obesity Effects of an Ethanolic Extract of Zanthoxylum bungeanum Maxim
Source: Front Pharmacol. 2020 Nov 13;11:572387. doi: 10.3389/fphar.2020.572387 (PMC7751641; doi:10.3389/fphar.2020.572387)
Supplement: Supplementary file 9 [file Table7_v1.XLSX]

## Sheet: Sheet1
Supplementary Table S7 | Details of the PPI network.
#node1	node2	node1_string_internal_id	node2_string_internal_id	node1_external_id	node2_external_id	neighborhood_on_chromosome	gene_fusion	phylogenetic_cooccurrence	homology	coexpression	experimentally_determined_interaction	database_annotated	automated_textmining	combined_score
CASP8	CASP3	4442125	4438651	9606.ENSP00000351273	9606.ENSP00000311032	0	0	0	0.835	0.061	0.993	0.9	0.978	0.999
NCOA2	AR	4448095	4444436	9606.ENSP00000399968	9606.ENSP00000363822	0	0	0	0	0	0.974	0.9	0.794	0.999
NCOA2	PPARG	4448095	4436745	9606.ENSP00000399968	9606.ENSP00000287820	0	0	0	0	0.062	0.974	0.9	0.356	0.998
NCOA1	PPARG	4447214	4436745	9606.ENSP00000385216	9606.ENSP00000287820	0	0	0	0	0	0.974	0.9	0.583	0.998
RELA	NFKBIA	4447098	4432983	9606.ENSP00000384273	9606.ENSP00000216797	0	0.003	0	0	0.084	0.953	0.9	0.77	0.998
ESR1	NCOA1	4448358	4447214	9606.ENSP00000405330	9606.ENSP00000385216	0	0	0	0	0	0.921	0.9	0.659	0.997
CYP1A1	AHR	4445265	4433805	9606.ENSP00000369050	9606.ENSP00000242057	0	0	0	0	0.061	0	0.9	0.975	0.997
IGF2	IGFBP3	4447717	4445494	9606.ENSP00000391826	9606.ENSP00000370473	0	0	0	0	0.155	0.379	0.9	0.938	0.996
VEGFA	HIF1A	4451310	4449842	9606.ENSP00000478570	9606.ENSP00000437955	0	0	0	0	0.062	0.348	0.9	0.947	0.996
BIRC5	CCNB1	4437778	4434484	9606.ENSP00000301633	9606.ENSP00000256442	0	0	0	0	0.888	0.185	0.9	0.651	0.996
BCL2	CASP8	4446777	4442125	9606.ENSP00000381185	9606.ENSP00000351273	0	0	0	0	0	0.993	0	0.43	0.996
ESR1	NCOA2	4448358	4448095	9606.ENSP00000405330	9606.ENSP00000399968	0	0	0	0	0.062	0.9	0.9	0.583	0.995
CAV1	NOS3	4440933	4437409	9606.ENSP00000339191	9606.ENSP00000297494	0	0	0	0	0	0.379	0.9	0.915	0.994
CASP8	CASP9	4442125	4440164	9606.ENSP00000351273	9606.ENSP00000330237	0	0	0	0.707	0	0.993	0	0.956	0.994
VEGFA	NOS3	4451310	4437409	9606.ENSP00000478570	9606.ENSP00000297494	0	0	0	0	0.062	0	0.9	0.934	0.993
RB1	CCND1	4435747	4433391	9606.ENSP00000267163	9606.ENSP00000227507	0	0	0	0	0.062	0.522	0.9	0.858	0.992
CAV1	EGFR	4440933	4436186	9606.ENSP00000339191	9606.ENSP00000275493	0	0	0	0	0.335	0.393	0.9	0.844	0.992
PARP1	CASP3	4442743	4438651	9606.ENSP00000355759	9606.ENSP00000311032	0	0	0	0	0.062	0.472	0.9	0.839	0.99
GSK3B	CCND1	4439717	4433391	9606.ENSP00000324806	9606.ENSP00000227507	0	0	0	0	0	0.526	0.9	0.822	0.99
ESR1	CCND1	4448358	4433391	9606.ENSP00000405330	9606.ENSP00000227507	0	0	0	0	0	0.384	0.9	0.858	0.99
ITGB2	ICAM1	4446737	4435501	9606.ENSP00000380948	9606.ENSP00000264832	0	0	0	0	0.113	0.379	0.9	0.829	0.989
EGFR	ERBB3	4436186	4435741	9606.ENSP00000275493	9606.ENSP00000267101	0	0	0	0.913	0.061	0.875	0.9	0.968	0.988
NCOA1	AR	4447214	4444436	9606.ENSP00000385216	9606.ENSP00000363822	0	0	0	0	0	0.525	0.9	0.751	0.987
AR	CCND1	4444436	4433391	9606.ENSP00000363822	9606.ENSP00000227507	0	0	0	0	0.061	0.384	0.9	0.795	0.986
ESR1	NOS3	4448358	4437409	9606.ENSP00000405330	9606.ENSP00000297494	0	0	0	0	0	0.472	0.9	0.749	0.985
IL6	RELA	4447254	4447098	9606.ENSP00000385675	9606.ENSP00000384273	0	0	0	0	0	0.223	0.9	0.804	0.983
MYC	ESR1	4451407	4448358	9606.ENSP00000479618	9606.ENSP00000405330	0	0	0	0	0	0.442	0.9	0.721	0.983
MYC	GSK3B	4451407	4439717	9606.ENSP00000479618	9606.ENSP00000324806	0	0	0	0	0.063	0.391	0.9	0.732	0.982
ESR1	FOS	4448358	4438204	9606.ENSP00000405330	9606.ENSP00000306245	0	0	0	0	0	0.475	0.9	0.688	0.982
IL6	FOS	4447254	4438204	9606.ENSP00000385675	9606.ENSP00000306245	0	0	0	0	0.088	0	0.9	0.819	0.982
VEGFA	IGF2	4451310	4447717	9606.ENSP00000478570	9606.ENSP00000391826	0	0	0	0	0.069	0	0.9	0.809	0.98
RELA	IRF1	4447098	4433930	9606.ENSP00000384273	9606.ENSP00000245414	0	0	0	0	0.062	0.379	0.9	0.709	0.98
LPL	PPARG	4438536	4436745	9606.ENSP00000309757	9606.ENSP00000287820	0	0	0	0	0.062	0	0.9	0.808	0.98
VEGFA	EGFR	4451310	4436186	9606.ENSP00000478570	9606.ENSP00000275493	0	0	0	0	0.089	0	0.6	0.947	0.979
ITGB2	VCAM1	4446737	4437090	9606.ENSP00000380948	9606.ENSP00000294728	0	0	0	0	0.444	0	0.9	0.63	0.977
INS	CAV1	4446661	4440933	9606.ENSP00000380432	9606.ENSP00000339191	0	0	0	0	0	0	0.9	0.775	0.976
HIF1A	EGFR	4449842	4436186	9606.ENSP00000437955	9606.ENSP00000275493	0	0	0	0	0	0	0.9	0.743	0.973
SLC2A4	PPARG	4439402	4436745	9606.ENSP00000320935	9606.ENSP00000287820	0	0	0	0	0.061	0	0.9	0.736	0.973
ALOX5	PTGS1	4444382	4442503	9606.ENSP00000363512	9606.ENSP00000354612	0	0	0	0	0.095	0	0.9	0.728	0.973
CASP9	CASP3	4440164	4438651	9606.ENSP00000330237	9606.ENSP00000311032	0	0	0	0.833	0.061	0.682	0.9	0.971	0.972
MYC	RELA	4451407	4447098	9606.ENSP00000479618	9606.ENSP00000384273	0	0	0	0	0	0.379	0.9	0.587	0.972
IL6	ERBB2	4447254	4435897	9606.ENSP00000385675	9606.ENSP00000269571	0	0	0	0	0	0	0.9	0.739	0.972
EGFR	ERBB2	4436186	4435897	9606.ENSP00000275493	9606.ENSP00000269571	0	0	0	0.941	0.077	0.699	0.9	0.967	0.971
IL6	CRP	4447254	4434405	9606.ENSP00000385675	9606.ENSP00000255030	0	0	0	0	0	0	0	0.97	0.97
INS	SLC2A4	4446661	4439402	9606.ENSP00000380432	9606.ENSP00000320935	0	0	0	0	0	0	0	0.968	0.969
HIF1A	NOS3	4449842	4437409	9606.ENSP00000437955	9606.ENSP00000297494	0	0	0	0	0	0	0.9	0.706	0.969
FOS	PPARG	4438204	4436745	9606.ENSP00000306245	9606.ENSP00000287820	0	0	0	0	0	0.098	0.9	0.683	0.968
RELA	FOS	4447098	4438204	9606.ENSP00000384273	9606.ENSP00000306245	0	0	0	0	0	0.379	0.9	0.539	0.968
ELK1	FOS	4451738	4438204	9606.ENSP00000483056	9606.ENSP00000306245	0	0	0	0	0	0.379	0.9	0.532	0.968
EGFR	RASA1	4436186	4436131	9606.ENSP00000275493	9606.ENSP00000274376	0	0	0	0	0	0.467	0.9	0.454	0.968
AR	GSK3B	4444436	4439717	9606.ENSP00000363822	9606.ENSP00000324806	0	0	0	0	0	0.407	0.9	0.49	0.967
CASP3	RB1	4438651	4435747	9606.ENSP00000311032	9606.ENSP00000267163	0	0	0	0	0	0.379	0.9	0.519	0.967
FOS	CCND1	4438204	4433391	9606.ENSP00000306245	9606.ENSP00000227507	0	0	0	0	0	0	0.9	0.685	0.967
INS	EGFR	4446661	4436186	9606.ENSP00000380432	9606.ENSP00000275493	0	0	0	0	0	0	0.8	0.843	0.967
RELA	CCND1	4447098	4433391	9606.ENSP00000384273	9606.ENSP00000227507	0	0	0	0	0	0.313	0.9	0.559	0.967
VCAM1	IRF1	4437090	4433930	9606.ENSP00000294728	9606.ENSP00000245414	0	0	0	0	0.066	0	0.9	0.663	0.965
AR	CASP8	4444436	4442125	9606.ENSP00000363822	9606.ENSP00000351273	0	0	0	0	0	0.472	0.9	0.399	0.965
MYC	BCL2	4451407	4446777	9606.ENSP00000479618	9606.ENSP00000381185	0	0	0	0	0	0.456	0.9	0.407	0.965
ESR1	PGR	4448358	4439740	9606.ENSP00000405330	9606.ENSP00000325120	0	0	0	0.679	0.102	0.472	0.9	0.964	0.964
MYC	CCND1	4451407	4433391	9606.ENSP00000479618	9606.ENSP00000227507	0	0	0	0	0.069	0	0	0.963	0.964
AR	RB1	4444436	4435747	9606.ENSP00000363822	9606.ENSP00000267163	0	0	0	0	0	0.388	0.9	0.444	0.963
ERBB2	ERBB3	4435897	4435741	9606.ENSP00000269571	9606.ENSP00000267101	0	0	0	0.897	0.115	0.561	0.9	0.969	0.962
RELA	PPARG	4447098	4436745	9606.ENSP00000384273	9606.ENSP00000287820	0	0	0	0	0	0.472	0.9	0.348	0.962
CYP1A1	GSTM1	4445265	4438694	9606.ENSP00000369050	9606.ENSP00000311469	0	0	0	0	0.061	0.077	0.65	0.892	0.962
ESR1	CTSD	4448358	4433665	9606.ENSP00000405330	9606.ENSP00000236671	0	0	0	0	0.087	0	0.9	0.587	0.959
VEGFA	IL6	4451310	4447254	9606.ENSP00000478570	9606.ENSP00000385675	0	0	0	0	0.063	0	0	0.957	0.959
PRKCA	EGFR	4448494	4436186	9606.ENSP00000408695	9606.ENSP00000275493	0	0	0	0.557	0.049	0.44	0.9	0.676	0.959
NCOA2	NCOA1	4448095	4447214	9606.ENSP00000399968	9606.ENSP00000385216	0	0	0	0.817	0.082	0.51	0.9	0.849	0.958
PRKCA	NFKBIA	4448494	4432983	9606.ENSP00000408695	9606.ENSP00000216797	0	0	0	0	0	0.39	0.9	0.356	0.957
ESR1	HSPB1	4448358	4434059	9606.ENSP00000405330	9606.ENSP00000248553	0	0	0	0	0	0.336	0.9	0.414	0.957
RUNX2	RB1	4443746	4435747	9606.ENSP00000360493	9606.ENSP00000267163	0	0	0	0	0	0.458	0.9	0.268	0.956
VEGFA	ERBB2	4451310	4435897	9606.ENSP00000478570	9606.ENSP00000269571	0	0	0	0	0	0	0.6	0.895	0.956
HIF1A	NCOA1	4449842	4447214	9606.ENSP00000437955	9606.ENSP00000385216	0	0	0	0.548	0	0.529	0.9	0.221	0.955
SELE	ICAM1	4440292	4435501	9606.ENSP00000331736	9606.ENSP00000264832	0	0	0	0	0.058	0	0	0.953	0.954
CHEK2	CCNB1	4445704	4434484	9606.ENSP00000372023	9606.ENSP00000256442	0	0	0	0	0.688	0.32	0	0.802	0.954
NCOA1	PGR	4447214	4439740	9606.ENSP00000385216	9606.ENSP00000325120	0	0	0	0	0	0.525	0.8	0.562	0.954
PGR	ERBB2	4439740	4435897	9606.ENSP00000325120	9606.ENSP00000269571	0	0	0	0	0	0.36	0	0.931	0.954
IL6	IGFBP3	4447254	4445494	9606.ENSP00000385675	9606.ENSP00000370473	0	0	0	0	0.076	0	0.9	0.536	0.953
RELA	CASP8	4447098	4442125	9606.ENSP00000384273	9606.ENSP00000351273	0	0	0	0	0.061	0	0.9	0.542	0.953
IL6	ICAM1	4447254	4435501	9606.ENSP00000385675	9606.ENSP00000264832	0	0	0	0	0.152	0	0	0.947	0.953
PARP1	CASP9	4442743	4440164	9606.ENSP00000355759	9606.ENSP00000330237	0	0	0	0	0.061	0.126	0.8	0.743	0.952
ICAM1	IRF1	4435501	4433930	9606.ENSP00000264832	9606.ENSP00000245414	0	0	0	0	0.156	0	0.9	0.477	0.952
RB1	RAF1	4435747	4434195	9606.ENSP00000267163	9606.ENSP00000251849	0	0	0	0	0	0.404	0.9	0.26	0.952
PLAU	EGFR	4444017	4436186	9606.ENSP00000361850	9606.ENSP00000275493	0	0	0	0	0.088	0	0.9	0.513	0.951
CYP1A1	CYP3A4	4445265	4440831	9606.ENSP00000369050	9606.ENSP00000337915	0	0	0.443	0.605	0.129	0	0.9	0.895	0.95
HSF1	GSK3B	4449594	4439717	9606.ENSP00000431512	9606.ENSP00000324806	0	0	0	0	0.061	0.098	0.9	0.469	0.949
IGF2	INS	4447717	4446661	9606.ENSP00000391826	9606.ENSP00000380432	0	0	0	0	0	0	0	0.947	0.948
IL6	INS	4447254	4446661	9606.ENSP00000385675	9606.ENSP00000380432	0	0	0	0	0	0	0	0.947	0.947
ESR1	ERBB2	4448358	4435897	9606.ENSP00000405330	9606.ENSP00000269571	0	0	0	0	0	0.32	0	0.926	0.947
PRKCA	RAF1	4448494	4434195	9606.ENSP00000408695	9606.ENSP00000251849	0	0	0	0.58	0	0.399	0.9	0.421	0.947
RASA1	RAF1	4436131	4434195	9606.ENSP00000274376	9606.ENSP00000251849	0	0	0	0	0.063	0.079	0.9	0.452	0.946
LPL	FABP1	4438536	4437198	9606.ENSP00000309757	9606.ENSP00000295834	0	0	0	0	0.055	0	0.9	0.472	0.945
INS	PPARG	4446661	4436745	9606.ENSP00000380432	9606.ENSP00000287820	0	0	0	0	0	0	0	0.944	0.945
CYP1B1	AHR	4451308	4433805	9606.ENSP00000478561	9606.ENSP00000242057	0	0	0	0	0.095	0	0	0.939	0.943
ESR1	EGFR	4448358	4436186	9606.ENSP00000405330	9606.ENSP00000275493	0	0	0	0	0	0.402	0	0.908	0.943
MYC	NFKBIA	4451407	4432983	9606.ENSP00000479618	9606.ENSP00000216797	0	0	0	0	0.057	0	0.9	0.445	0.943
PRKCA	NFE2L2	4448494	4446632	9606.ENSP00000408695	9606.ENSP00000380252	0	0	0	0	0	0.379	0.9	0.145	0.942
NFE2L2	NQO1	4446632	4439310	9606.ENSP00000380252	9606.ENSP00000319788	0	0	0	0	0	0	0	0.94	0.941
PPARG	RB1	4436745	4435747	9606.ENSP00000287820	9606.ENSP00000267163	0	0	0	0	0	0.315	0.9	0.221	0.941
NFE2L2	FOS	4446632	4438204	9606.ENSP00000380252	9606.ENSP00000306245	0	0	0	0	0	0.051	0.9	0.426	0.94
VCAM1	ICAM1	4437090	4435501	9606.ENSP00000294728	9606.ENSP00000264832	0	0	0	0	0.069	0	0	0.938	0.94
PRKCA	TBXA2R	4448494	4447795	9606.ENSP00000408695	9606.ENSP00000393333	0	0	0	0	0	0.388	0.9	0.088	0.939
LPL	CETP	4438536	4432783	9606.ENSP00000309757	9606.ENSP00000200676	0	0	0	0	0.064	0.379	0.54	0.796	0.938
INS	IGFBP3	4446661	4445494	9606.ENSP00000380432	9606.ENSP00000370473	0	0	0	0	0	0	0	0.937	0.938
BIRC5	RASA1	4437778	4436131	9606.ENSP00000301633	9606.ENSP00000274376	0	0	0	0	0.055	0.379	0.9	0.049	0.936
CYP1B1	CYP1A1	4451308	4445265	9606.ENSP00000478561	9606.ENSP00000369050	0	0	0.424	0.893	0.277	0	0.9	0.936	0.935
CCNB1	CCND1	4434484	4433391	9606.ENSP00000256442	9606.ENSP00000227507	0	0	0	0.65	0.096	0.064	0.9	0.861	0.935
RASSF1	CCND1	4441940	4433391	9606.ENSP00000349547	9606.ENSP00000227507	0	0	0	0	0	0	0.8	0.683	0.933
SELE	VCAM1	4440292	4437090	9606.ENSP00000331736	9606.ENSP00000294728	0	0	0	0	0.12	0	0	0.926	0.932
MGAM	ITGB2	4450229	4446737	9606.ENSP00000447378	9606.ENSP00000380948	0	0	0	0	0.158	0	0.9	0.22	0.928
CAV1	GSK3B	4440933	4439717	9606.ENSP00000339191	9606.ENSP00000324806	0	0	0	0	0	0.057	0.9	0.282	0.926
ESR1	BCL2	4448358	4446777	9606.ENSP00000405330	9606.ENSP00000381185	0	0	0	0	0.069	0.064	0.9	0.244	0.925
NCOA1	CYP1A1	4447214	4445265	9606.ENSP00000385216	9606.ENSP00000369050	0	0	0	0	0	0	0.9	0.264	0.923
INS	CRP	4446661	4434405	9606.ENSP00000380432	9606.ENSP00000255030	0	0	0	0	0.063	0	0	0.921	0.922
RELA	RAF1	4447098	4434195	9606.ENSP00000384273	9606.ENSP00000251849	0	0	0	0	0.112	0	0.9	0.187	0.921
IL6	EGFR	4447254	4436186	9606.ENSP00000385675	9606.ENSP00000275493	0	0	0	0	0	0	0.6	0.811	0.921
BDNF	RASA1	4448727	4436131	9606.ENSP00000414303	9606.ENSP00000274376	0	0	0	0	0.062	0	0.9	0.23	0.921
NCOA2	CYP1A1	4448095	4445265	9606.ENSP00000399968	9606.ENSP00000369050	0	0	0	0	0.062	0	0.9	0.224	0.92
AR	PGR	4444436	4439740	9606.ENSP00000363822	9606.ENSP00000325120	0	0	0	0.813	0.069	0	0.9	0.904	0.919
VEGFA	INS	4451310	4446661	9606.ENSP00000478570	9606.ENSP00000380432	0	0	0	0	0	0	0	0.918	0.919
PRKCA	RELA	4448494	4447098	9606.ENSP00000408695	9606.ENSP00000384273	0	0	0	0	0	0	0.9	0.214	0.918
CASP8	COL3A1	4442125	4438049	9606.ENSP00000351273	9606.ENSP00000304408	0	0	0	0	0	0	0.9	0.216	0.918
ITGB2	PLAU	4446737	4444017	9606.ENSP00000380948	9606.ENSP00000361850	0	0	0	0	0.063	0	0.9	0.198	0.918
NCOA1	LPL	4447214	4438536	9606.ENSP00000385216	9606.ENSP00000309757	0	0	0	0	0	0	0.9	0.206	0.917
EGFR	CCND1	4436186	4433391	9606.ENSP00000275493	9606.ENSP00000227507	0	0	0	0	0.2	0.157	0	0.886	0.917
RELA	LPL	4447098	4438536	9606.ENSP00000384273	9606.ENSP00000309757	0	0	0	0	0	0	0.9	0.209	0.917
MYC	FOS	4451407	4438204	9606.ENSP00000479618	9606.ENSP00000306245	0	0	0	0	0.064	0.442	0	0.851	0.915
CYP1A1	FABP1	4445265	4437198	9606.ENSP00000369050	9606.ENSP00000295834	0	0	0	0	0.129	0	0.9	0.108	0.915
ADRA1A	CHRM3	4445417	4434428	9606.ENSP00000369960	9606.ENSP00000255380	0	0	0	0.653	0	0	0.9	0.466	0.915
ELK1	PRKCA	4451738	4448494	9606.ENSP00000483056	9606.ENSP00000408695	0	0	0	0	0	0	0.9	0.187	0.915
CHRM2	PTGER3	4448086	4441881	9606.ENSP00000399745	9606.ENSP00000349003	0	0	0	0	0	0	0.9	0.178	0.914
INS	NOS3	4446661	4437409	9606.ENSP00000380432	9606.ENSP00000297494	0	0	0	0	0	0	0	0.914	0.914
PON1	CETP	4433224	4432783	9606.ENSP00000222381	9606.ENSP00000200676	0	0	0	0	0	0	0.72	0.703	0.913
NCOA1	FABP1	4447214	4437198	9606.ENSP00000385216	9606.ENSP00000295834	0	0	0	0	0	0	0.9	0.162	0.912
NCOA1	SLC2A4	4447214	4439402	9606.ENSP00000385216	9606.ENSP00000320935	0	0	0	0	0	0	0.9	0.143	0.91
NCOA1	FOS	4447214	4438204	9606.ENSP00000385216	9606.ENSP00000306245	0	0	0	0	0	0.415	0.8	0.293	0.91
PRKCA	RASA1	4448494	4436131	9606.ENSP00000408695	9606.ENSP00000274376	0	0	0	0	0.052	0.131	0.9	0	0.91
NCOA2	LPL	4448095	4438536	9606.ENSP00000399968	9606.ENSP00000309757	0	0	0	0	0	0	0.9	0.138	0.91
GSTP1	CYP1A1	4446837	4445265	9606.ENSP00000381607	9606.ENSP00000369050	0	0	0	0	0	0.077	0.65	0.738	0.908
TBXA2R	ADRA1A	4447795	4445417	9606.ENSP00000393333	9606.ENSP00000369960	0	0	0	0.581	0	0	0.9	0.237	0.908
IGF2	CCND1	4447717	4433391	9606.ENSP00000391826	9606.ENSP00000227507	0	0	0	0	0.092	0	0	0.901	0.907
NCOA2	CTSD	4448095	4433665	9606.ENSP00000399968	9606.ENSP00000236671	0	0	0	0	0	0	0.9	0.106	0.906
TBXA2R	CHRM3	4447795	4434428	9606.ENSP00000393333	9606.ENSP00000255380	0	0	0	0	0	0	0.9	0.101	0.906
GSK3B	TP63	4439717	4435488	9606.ENSP00000324806	9606.ENSP00000264731	0	0	0	0	0	0	0.9	0.101	0.906
NCOA1	NR1I3	4447214	4442999	9606.ENSP00000385216	9606.ENSP00000356959	0	0	0	0	0	0.809	0	0.525	0.905
POR	NFE2L2	4449076	4446632	9606.ENSP00000419970	9606.ENSP00000380252	0	0	0	0	0	0	0.9	0.097	0.905
CHRM2	EGFR	4448086	4436186	9606.ENSP00000399745	9606.ENSP00000275493	0	0	0	0	0.061	0	0.9	0.073	0.905
NCOA2	SLC2A4	4448095	4439402	9606.ENSP00000399968	9606.ENSP00000320935	0	0	0	0	0	0	0.9	0.097	0.905
NCOA1	CTSD	4447214	4433665	9606.ENSP00000385216	9606.ENSP00000236671	0	0	0	0	0	0	0.9	0.088	0.904
NQO1	TP63	4439310	4435488	9606.ENSP00000319788	9606.ENSP00000264731	0	0	0	0	0	0	0.9	0.066	0.902
NCOA2	FABP1	4448095	4437198	9606.ENSP00000399968	9606.ENSP00000295834	0	0	0	0	0	0	0.9	0.062	0.902
MGAM	PLAU	4450229	4444017	9606.ENSP00000447378	9606.ENSP00000361850	0	0	0	0	0	0	0.9	0.06	0.901
POR	FOS	4449076	4438204	9606.ENSP00000419970	9606.ENSP00000306245	0	0	0	0	0	0	0.9	0.047	0.9
RELA	FABP1	4447098	4437198	9606.ENSP00000384273	9606.ENSP00000295834	0	0	0	0	0	0	0.9	0.047	0.9
FOS	EGFR	4438204	4436186	9606.ENSP00000306245	9606.ENSP00000275493	0	0	0	0	0	0.533	0	0.794	0.9
EGFR	HSPB1	4436186	4434059	9606.ENSP00000275493	9606.ENSP00000248553	0	0	0	0	0.089	0.692	0	0.671	0.899
IL6	VCAM1	4447254	4437090	9606.ENSP00000385675	9606.ENSP00000294728	0	0	0	0	0.083	0	0	0.891	0.896
MYC	ERBB2	4451407	4435897	9606.ENSP00000479618	9606.ENSP00000269571	0	0	0	0	0.06	0.139	0	0.88	0.895
PGR	CCND1	4439740	4433391	9606.ENSP00000325120	9606.ENSP00000227507	0	0	0	0	0	0.43	0	0.817	0.892
PRKCA	FOS	4448494	4438204	9606.ENSP00000408695	9606.ENSP00000306245	0	0	0	0	0	0	0.8	0.473	0.89
VEGFA	ICAM1	4451310	4435501	9606.ENSP00000478570	9606.ENSP00000264832	0	0	0	0	0	0	0	0.89	0.89
INS	ERBB3	4446661	4435741	9606.ENSP00000380432	9606.ENSP00000267101	0	0	0	0	0	0	0.6	0.735	0.889
ESR1	AHR	4448358	4433805	9606.ENSP00000405330	9606.ENSP00000242057	0	0	0	0	0	0.384	0	0.826	0.888
ERBB2	CCND1	4435897	4433391	9606.ENSP00000269571	9606.ENSP00000227507	0	0	0	0	0.098	0.43	0	0.799	0.888
CYP1B1	GSTM1	4451308	4438694	9606.ENSP00000478561	9606.ENSP00000311469	0	0	0	0	0.054	0.077	0.65	0.672	0.886
CYP1B1	GSTP1	4451308	4446837	9606.ENSP00000478561	9606.ENSP00000381607	0	0	0	0	0	0.077	0.65	0.674	0.885
POR	CYP3A4	4449076	4440831	9606.ENSP00000419970	9606.ENSP00000337915	0.042	0.384	0	0	0	0.356	0	0.729	0.883
CASP3	HSPB1	4438651	4434059	9606.ENSP00000311032	9606.ENSP00000248553	0	0	0	0	0	0.437	0	0.793	0.879
ICAM1	CRP	4435501	4434405	9606.ENSP00000264832	9606.ENSP00000255030	0	0	0	0	0	0	0	0.875	0.875
INS	ERBB2	4446661	4435897	9606.ENSP00000380432	9606.ENSP00000269571	0	0	0	0	0	0	0.6	0.702	0.875
PRKCA	CASP3	4448494	4438651	9606.ENSP00000408695	9606.ENSP00000311032	0	0	0	0	0	0	0.8	0.398	0.874
VCAM1	CRP	4437090	4434405	9606.ENSP00000294728	9606.ENSP00000255030	0	0	0	0	0	0	0	0.873	0.873
MYC	EGFR	4451407	4436186	9606.ENSP00000479618	9606.ENSP00000275493	0	0	0	0	0	0	0	0.871	0.872
MYC	HIF1A	4451407	4449842	9606.ENSP00000479618	9606.ENSP00000437955	0	0	0	0	0	0.433	0	0.783	0.872
VEGFA	BDNF	4451310	4448727	9606.ENSP00000478570	9606.ENSP00000414303	0	0	0	0	0	0	0	0.871	0.871
INS	LPL	4446661	4438536	9606.ENSP00000380432	9606.ENSP00000309757	0	0	0	0	0	0	0	0.866	0.866
IGFBP3	EGFR	4445494	4436186	9606.ENSP00000370473	9606.ENSP00000275493	0	0	0	0	0.278	0.379	0	0.72	0.863
NOS3	CRP	4437409	4434405	9606.ENSP00000297494	9606.ENSP00000255030	0	0	0	0	0	0	0	0.861	0.861
INS	UCP2	4446661	4438746	9606.ENSP00000380432	9606.ENSP00000312029	0	0	0	0	0	0	0	0.859	0.86
BDNF	FOS	4448727	4438204	9606.ENSP00000414303	9606.ENSP00000306245	0	0	0	0	0	0	0	0.859	0.86
MYC	VEGFA	4451407	4451310	9606.ENSP00000479618	9606.ENSP00000478570	0	0	0	0	0	0	0	0.854	0.854
CASP3	CCND1	4438651	4433391	9606.ENSP00000311032	9606.ENSP00000227507	0	0	0	0	0.061	0	0	0.851	0.854
INS	SLC2A2	4446661	4439612	9606.ENSP00000380432	9606.ENSP00000323568	0	0	0	0	0	0	0	0.853	0.853
MYC	AR	4451407	4444436	9606.ENSP00000479618	9606.ENSP00000363822	0	0	0	0	0	0	0	0.853	0.853
VEGFA	VCAM1	4451310	4437090	9606.ENSP00000478570	9606.ENSP00000294728	0	0	0	0	0.061	0	0	0.848	0.852
MYC	IL6	4451407	4447254	9606.ENSP00000479618	9606.ENSP00000385675	0	0	0	0	0	0	0	0.85	0.85
HK2	AKR1B1	4436875	4436650	9606.ENSP00000290573	9606.ENSP00000285930	0	0.003	0	0	0.064	0.05	0.8	0.235	0.845
CYP3A4	GSTM1	4440831	4438694	9606.ENSP00000337915	9606.ENSP00000311469	0	0	0	0	0	0.064	0.65	0.555	0.841
AR	ERBB2	4444436	4435897	9606.ENSP00000363822	9606.ENSP00000269571	0	0	0	0	0.067	0.077	0	0.829	0.84
GSTP1	CYP3A4	4446837	4440831	9606.ENSP00000381607	9606.ENSP00000337915	0	0	0	0	0	0.064	0.65	0.551	0.84
VEGFA	CRP	4451310	4434405	9606.ENSP00000478570	9606.ENSP00000255030	0	0	0	0	0	0	0	0.839	0.839
ESR1	CAV1	4448358	4440933	9606.ENSP00000405330	9606.ENSP00000339191	0	0	0	0	0	0.4	0	0.734	0.834
NFE2L2	AHR	4446632	4433805	9606.ENSP00000380252	9606.ENSP00000242057	0	0	0	0	0	0.379	0	0.742	0.834
IGF2	EGFR	4447717	4436186	9606.ENSP00000391826	9606.ENSP00000275493	0	0	0	0	0.088	0	0.6	0.579	0.833
NOS3	VCAM1	4437409	4437090	9606.ENSP00000297494	9606.ENSP00000294728	0	0	0	0	0	0	0	0.83	0.83
HSF1	HSPB1	4449594	4434059	9606.ENSP00000431512	9606.ENSP00000248553	0	0	0	0	0.09	0.294	0	0.755	0.828
NCOA2	NR1I3	4448095	4442999	9606.ENSP00000399968	9606.ENSP00000356959	0	0	0	0	0	0.767	0	0.289	0.827
BDNF	EGFR	4448727	4436186	9606.ENSP00000414303	9606.ENSP00000275493	0	0	0	0	0.132	0	0.6	0.541	0.826
VEGFA	ERBB3	4451310	4435741	9606.ENSP00000478570	9606.ENSP00000267101	0	0	0	0	0	0	0.6	0.585	0.826
NR1I3	CYP3A4	4442999	4440831	9606.ENSP00000356959	9606.ENSP00000337915	0	0	0	0	0.061	0.085	0	0.808	0.821
PARP1	CASP8	4442743	4442125	9606.ENSP00000355759	9606.ENSP00000351273	0	0	0	0	0	0.394	0	0.715	0.82
VEGFA	SELE	4451310	4440292	9606.ENSP00000478570	9606.ENSP00000331736	0	0	0	0	0	0	0	0.82	0.82
MYC	INS	4451407	4446661	9606.ENSP00000479618	9606.ENSP00000380432	0	0	0	0	0	0	0	0.817	0.818
INS	VCAM1	4446661	4437090	9606.ENSP00000380432	9606.ENSP00000294728	0	0	0	0	0	0	0	0.817	0.817
VEGFA	ESR1	4451310	4448358	9606.ENSP00000478570	9606.ENSP00000405330	0	0	0	0	0.061	0	0	0.813	0.816
INS	HK2	4446661	4436875	9606.ENSP00000380432	9606.ENSP00000290573	0	0	0	0	0	0	0	0.814	0.814
INS	FOS	4446661	4438204	9606.ENSP00000380432	9606.ENSP00000306245	0	0	0	0	0	0	0	0.813	0.814
CAV1	ERBB2	4440933	4435897	9606.ENSP00000339191	9606.ENSP00000269571	0	0	0	0	0.06	0.379	0	0.705	0.813
UCP2	PPARG	4438746	4436745	9606.ENSP00000312029	9606.ENSP00000287820	0	0	0	0	0.053	0.081	0	0.802	0.813
HIF1A	ESR1	4449842	4448358	9606.ENSP00000437955	9606.ENSP00000405330	0	0	0	0	0	0.413	0	0.695	0.813
IL6	CCND1	4447254	4433391	9606.ENSP00000385675	9606.ENSP00000227507	0	0	0	0	0	0	0	0.812	0.813
IL6	PPARG	4447254	4436745	9606.ENSP00000385675	9606.ENSP00000287820	0	0	0	0	0	0	0	0.812	0.812
PGR	EGFR	4439740	4436186	9606.ENSP00000325120	9606.ENSP00000275493	0	0	0	0	0	0.077	0	0.804	0.811
BDNF	IL6	4448727	4447254	9606.ENSP00000414303	9606.ENSP00000385675	0	0	0	0	0	0	0	0.811	0.811
AR	RUNX2	4444436	4443746	9606.ENSP00000363822	9606.ENSP00000360493	0	0	0	0	0	0.472	0	0.655	0.81
IL6	SELE	4447254	4440292	9606.ENSP00000385675	9606.ENSP00000331736	0	0	0	0	0.12	0	0	0.79	0.807
VEGFA	RUNX2	4451310	4443746	9606.ENSP00000478570	9606.ENSP00000360493	0	0	0	0	0	0	0	0.806	0.806
AR	EGFR	4444436	4436186	9606.ENSP00000363822	9606.ENSP00000275493	0	0	0	0	0.062	0.402	0	0.678	0.803
MYC	CCNB1	4451407	4434484	9606.ENSP00000479618	9606.ENSP00000256442	0	0	0	0	0.096	0.354	0	0.685	0.8
IL6	NOS3	4447254	4437409	9606.ENSP00000385675	9606.ENSP00000297494	0	0	0	0	0.058	0	0	0.796	0.8
IGF2	ERBB2	4447717	4435897	9606.ENSP00000391826	9606.ENSP00000269571	0	0	0	0	0.061	0	0.6	0.511	0.8
GSTP1	RASSF1	4446837	4441940	9606.ENSP00000381607	9606.ENSP00000349547	0	0	0	0	0	0	0	0.797	0.797
MYC	NFE2L2	4451407	4446632	9606.ENSP00000479618	9606.ENSP00000380252	0	0	0	0	0	0.405	0	0.673	0.797
NFE2L2	PPARG	4446632	4436745	9606.ENSP00000380252	9606.ENSP00000287820	0	0	0	0	0	0.379	0	0.685	0.796
BDNF	NOS3	4448727	4437409	9606.ENSP00000414303	9606.ENSP00000297494	0	0	0	0	0	0.379	0	0.683	0.795
CASP3	NOS3	4438651	4437409	9606.ENSP00000311032	9606.ENSP00000297494	0	0	0	0	0	0	0	0.793	0.793
INS	ICAM1	4446661	4435501	9606.ENSP00000380432	9606.ENSP00000264832	0	0	0	0	0	0	0	0.793	0.793
SELE	CRP	4440292	4434405	9606.ENSP00000331736	9606.ENSP00000255030	0	0	0	0	0.063	0	0	0.788	0.792
AR	CAV1	4444436	4440933	9606.ENSP00000363822	9606.ENSP00000339191	0	0	0	0	0	0.4	0	0.665	0.791
GSTM1	ADH1B	4438694	4438237	9606.ENSP00000311469	9606.ENSP00000306606	0	0	0	0	0.061	0	0.65	0.413	0.79
ICAM1	NFKBIA	4435501	4432983	9606.ENSP00000264832	9606.ENSP00000216797	0	0	0	0	0.126	0	0	0.769	0.789
CYP3A4	AHR	4440831	4433805	9606.ENSP00000337915	9606.ENSP00000242057	0	0	0	0	0.061	0	0	0.783	0.788
IL6	IRF1	4447254	4433930	9606.ENSP00000385675	9606.ENSP00000245414	0	0	0	0	0.082	0	0	0.777	0.787
IL6	AR	4447254	4444436	9606.ENSP00000385675	9606.ENSP00000363822	0	0	0	0	0	0	0	0.787	0.787
PPARG	EGFR	4436745	4436186	9606.ENSP00000287820	9606.ENSP00000275493	0	0	0	0	0.062	0.402	0	0.65	0.787
AR	ERBB3	4444436	4435741	9606.ENSP00000363822	9606.ENSP00000267101	0	0	0	0	0.062	0.338	0	0.682	0.785
VEGFA	CCND1	4451310	4433391	9606.ENSP00000478570	9606.ENSP00000227507	0	0	0	0	0.069	0.17	0	0.743	0.784
ACACA	INS	4451758	4446661	9606.ENSP00000483300	9606.ENSP00000380432	0	0	0	0	0	0	0	0.783	0.783
ERBB3	CCND1	4435741	4433391	9606.ENSP00000267101	9606.ENSP00000227507	0	0	0	0	0.061	0.125	0	0.756	0.782
VEGFA	CAV1	4451310	4440933	9606.ENSP00000478570	9606.ENSP00000339191	0	0	0	0	0.076	0	0	0.772	0.78
INS	CASP3	4446661	4438651	9606.ENSP00000380432	9606.ENSP00000311032	0	0	0	0	0	0	0	0.78	0.78
INS	CETP	4446661	4432783	9606.ENSP00000380432	9606.ENSP00000200676	0	0	0	0	0	0	0	0.778	0.778
IL6	AHR	4447254	4433805	9606.ENSP00000385675	9606.ENSP00000242057	0	0	0	0	0.069	0	0	0.769	0.777
MYC	CASP3	4451407	4438651	9606.ENSP00000479618	9606.ENSP00000311032	0	0	0	0	0.061	0	0	0.77	0.775
IL6	CASP3	4447254	4438651	9606.ENSP00000385675	9606.ENSP00000311032	0	0	0	0	0	0	0	0.771	0.771
NR1I3	AHR	4442999	4433805	9606.ENSP00000356959	9606.ENSP00000242057	0	0	0	0	0	0.05	0	0.768	0.771
ESR1	INS	4448358	4446661	9606.ENSP00000405330	9606.ENSP00000380432	0	0	0	0	0	0	0	0.77	0.77
ESR1	IL6	4448358	4447254	9606.ENSP00000405330	9606.ENSP00000385675	0	0	0	0	0	0	0	0.769	0.769
VEGFA	PPARG	4451310	4436745	9606.ENSP00000478570	9606.ENSP00000287820	0	0	0	0	0	0	0	0.769	0.769
VEGFA	IGFBP3	4451310	4445494	9606.ENSP00000478570	9606.ENSP00000370473	0	0	0	0	0.091	0	0	0.754	0.767
CASP9	BIRC5	4440164	4437778	9606.ENSP00000330237	9606.ENSP00000301633	0	0	0	0	0	0.588	0	0.455	0.766
IL6	SLC2A4	4447254	4439402	9606.ENSP00000385675	9606.ENSP00000320935	0	0	0	0	0	0	0	0.765	0.766
CASP3	CCNB1	4438651	4434484	9606.ENSP00000311032	9606.ENSP00000256442	0	0	0	0	0.084	0	0	0.753	0.765
RELA	AR	4447098	4444436	9606.ENSP00000384273	9606.ENSP00000363822	0	0	0	0	0	0.393	0	0.625	0.763
BCL2	CASP3	4446777	4438651	9606.ENSP00000381185	9606.ENSP00000311032	0	0	0	0	0	0.461	0	0.578	0.763
ESR1	PARP1	4448358	4442743	9606.ENSP00000405330	9606.ENSP00000355759	0	0	0	0	0	0.342	0	0.652	0.761
MYC	RB1	4451407	4435747	9606.ENSP00000479618	9606.ENSP00000267163	0	0	0	0	0	0.379	0	0.631	0.761
NOS3	PPARG	4437409	4436745	9606.ENSP00000297494	9606.ENSP00000287820	0	0	0	0	0.053	0.091	0	0.741	0.757
MYC	PARP1	4451407	4442743	9606.ENSP00000479618	9606.ENSP00000355759	0	0	0	0	0	0	0	0.754	0.755
CIDEA	PPARG	4439342	4436745	9606.ENSP00000320209	9606.ENSP00000287820	0	0	0	0	0.061	0	0	0.749	0.754
CYP1A1	NQO1	4445265	4439310	9606.ENSP00000369050	9606.ENSP00000319788	0	0	0	0	0.085	0	0	0.741	0.753
CAV1	CCND1	4440933	4433391	9606.ENSP00000339191	9606.ENSP00000227507	0	0	0	0	0.214	0	0	0.697	0.752
CASP3	EGFR	4438651	4436186	9606.ENSP00000311032	9606.ENSP00000275493	0	0	0	0	0	0.05	0	0.748	0.751
ESR1	RUNX2	4448358	4443746	9606.ENSP00000405330	9606.ENSP00000360493	0	0	0	0	0	0.185	0	0.707	0.751
RELA	PARP1	4447098	4442743	9606.ENSP00000384273	9606.ENSP00000355759	0	0	0	0	0	0.379	0	0.616	0.751
LPL	PON1	4438536	4433224	9606.ENSP00000309757	9606.ENSP00000222381	0	0	0	0	0	0	0.54	0.479	0.75
AR	CASP3	4444436	4438651	9606.ENSP00000363822	9606.ENSP00000311032	0	0	0	0	0	0.39	0	0.6	0.746
VEGFA	AHR	4451310	4433805	9606.ENSP00000478570	9606.ENSP00000242057	0	0	0	0	0	0	0	0.744	0.744
IGF2	ERBB3	4447717	4435741	9606.ENSP00000391826	9606.ENSP00000267101	0	0	0	0	0	0	0.6	0.386	0.743
NQO1	GSTM1	4439310	4438694	9606.ENSP00000319788	9606.ENSP00000311469	0	0	0	0	0.057	0	0	0.738	0.743
GSTP1	ADH1B	4446837	4438237	9606.ENSP00000381607	9606.ENSP00000306606	0	0	0	0	0	0	0.65	0.296	0.743
VEGFA	AR	4451310	4444436	9606.ENSP00000478570	9606.ENSP00000363822	0	0	0	0	0	0	0	0.742	0.742
CHEK2	CCND1	4445704	4433391	9606.ENSP00000372023	9606.ENSP00000227507	0	0	0	0	0.088	0	0	0.727	0.741
SLC2A4	LPL	4439402	4438536	9606.ENSP00000320935	9606.ENSP00000309757	0	0	0	0	0.061	0	0	0.733	0.739
RUNX2	PPARG	4443746	4436745	9606.ENSP00000360493	9606.ENSP00000287820	0	0	0	0	0	0.185	0	0.692	0.738
VEGFA	CASP3	4451310	4438651	9606.ENSP00000478570	9606.ENSP00000311032	0	0	0	0	0	0	0	0.737	0.737
CASP9	CCND1	4440164	4433391	9606.ENSP00000330237	9606.ENSP00000227507	0	0	0	0	0	0	0	0.737	0.737
CASP8	EGFR	4442125	4436186	9606.ENSP00000351273	9606.ENSP00000275493	0	0	0	0	0	0.05	0	0.733	0.736
AR	AHR	4444436	4433805	9606.ENSP00000363822	9606.ENSP00000242057	0	0	0	0	0	0.384	0	0.589	0.736
RELA	ICAM1	4447098	4435501	9606.ENSP00000384273	9606.ENSP00000264832	0	0	0	0	0.065	0.417	0	0.554	0.735
EGFR	CCNB1	4436186	4434484	9606.ENSP00000275493	9606.ENSP00000256442	0	0	0	0	0	0.085	0	0.722	0.735
IGFBP3	PPARG	4445494	4436745	9606.ENSP00000370473	9606.ENSP00000287820	0	0	0	0	0	0.379	0	0.588	0.733
CASP3	BIRC5	4438651	4437778	9606.ENSP00000311032	9606.ENSP00000301633	0	0	0	0	0.061	0.469	0	0.507	0.733
MGAM	INS	4450229	4446661	9606.ENSP00000447378	9606.ENSP00000380432	0	0	0	0	0	0	0	0.733	0.733
ESR1	RB1	4448358	4435747	9606.ENSP00000405330	9606.ENSP00000267163	0	0	0	0	0	0.055	0	0.729	0.733
HIF1A	INS	4449842	4446661	9606.ENSP00000437955	9606.ENSP00000380432	0	0	0	0	0	0	0	0.732	0.732
ESR1	RASSF1	4448358	4441940	9606.ENSP00000405330	9606.ENSP00000349547	0	0	0	0	0	0	0	0.731	0.731
RB1	CCNB1	4435747	4434484	9606.ENSP00000267163	9606.ENSP00000256442	0	0	0	0	0.064	0.4	0	0.555	0.728
POR	CYP1A1	4449076	4445265	9606.ENSP00000419970	9606.ENSP00000369050	0.042	0	0	0	0.051	0.053	0	0.72	0.727
BDNF	ERBB2	4448727	4435897	9606.ENSP00000414303	9606.ENSP00000269571	0	0	0	0	0	0	0.6	0.341	0.725
INS	CIDEA	4446661	4439342	9606.ENSP00000380432	9606.ENSP00000320209	0	0	0	0	0	0	0	0.725	0.725
MYC	RAF1	4451407	4434195	9606.ENSP00000479618	9606.ENSP00000251849	0	0	0	0	0.05	0.391	0	0.56	0.723
GSTP1	NQO1	4446837	4439310	9606.ENSP00000381607	9606.ENSP00000319788	0	0	0	0	0.064	0	0	0.717	0.723
NFE2L2	CASP3	4446632	4438651	9606.ENSP00000380252	9606.ENSP00000311032	0	0	0	0	0	0.379	0	0.571	0.722
GSTP1	GSTM1	4446837	4438694	9606.ENSP00000381607	9606.ENSP00000311469	0	0	0	0.782	0	0	0.65	0.927	0.72
NCOA2	PGR	4448095	4439740	9606.ENSP00000399968	9606.ENSP00000325120	0	0	0	0	0	0.461	0	0.499	0.718
CAV1	PPARG	4440933	4436745	9606.ENSP00000339191	9606.ENSP00000287820	0	0	0	0	0.071	0.466	0	0.473	0.716
BDNF	INS	4448727	4446661	9606.ENSP00000414303	9606.ENSP00000380432	0	0	0	0	0	0	0	0.715	0.715
INS	CYP3A4	4446661	4440831	9606.ENSP00000380432	9606.ENSP00000337915	0	0	0	0	0	0	0	0.713	0.713
CHEK2	TP63	4445704	4435488	9606.ENSP00000372023	9606.ENSP00000264731	0	0	0	0	0.062	0.493	0	0.439	0.71
IL6	PON1	4447254	4433224	9606.ENSP00000385675	9606.ENSP00000222381	0	0	0	0	0	0	0	0.708	0.708
CYP1B1	NQO1	4451308	4439310	9606.ENSP00000478561	9606.ENSP00000319788	0	0	0	0	0.061	0	0	0.7	0.706
NOS3	ICAM1	4437409	4435501	9606.ENSP00000297494	9606.ENSP00000264832	0	0	0	0	0	0	0	0.705	0.705
PPARG	ICAM1	4436745	4435501	9606.ENSP00000287820	9606.ENSP00000264832	0	0	0	0	0.061	0	0	0.698	0.705
BDNF	ERBB3	4448727	4435741	9606.ENSP00000414303	9606.ENSP00000267101	0	0	0	0	0	0	0.6	0.294	0.705
PGR	RB1	4439740	4435747	9606.ENSP00000325120	9606.ENSP00000267163	0	0	0	0	0	0.055	0	0.7	0.704
SLC2A4	HK2	4439402	4436875	9606.ENSP00000320935	9606.ENSP00000290573	0	0	0	0	0.063	0.068	0	0.686	0.702
MYC	PGR	4451407	4439740	9606.ENSP00000479618	9606.ENSP00000325120	0	0	0	0	0	0.305	0	0.587	0.701
IGF2	IL6	4447717	4447254	9606.ENSP00000391826	9606.ENSP00000385675	0	0	0	0	0	0	0	0.697	0.698
ESR1	CYP1A1	4448358	4445265	9606.ENSP00000405330	9606.ENSP00000369050	0	0	0	0	0.061	0.085	0	0.675	0.696
CASP3	ERBB2	4438651	4435897	9606.ENSP00000311032	9606.ENSP00000269571	0	0	0	0	0	0.05	0	0.691	0.694
CHEK2	PARP1	4445704	4442743	9606.ENSP00000372023	9606.ENSP00000355759	0	0	0	0	0.064	0	0	0.685	0.693
IL6	NFKBIA	4447254	4432983	9606.ENSP00000385675	9606.ENSP00000216797	0	0	0	0	0.109	0	0	0.67	0.693
INS	GSK3B	4446661	4439717	9606.ENSP00000380432	9606.ENSP00000324806	0	0	0	0	0	0.262	0	0.6	0.692
IGFBP3	CAV1	4445494	4440933	9606.ENSP00000370473	9606.ENSP00000339191	0	0	0	0	0.3	0.379	0	0.348	0.691
INS	CCND1	4446661	4433391	9606.ENSP00000380432	9606.ENSP00000227507	0	0	0	0	0	0	0	0.689	0.689
BDNF	ESR1	4448727	4448358	9606.ENSP00000414303	9606.ENSP00000405330	0	0	0	0	0	0.379	0	0.52	0.689
HIF1A	PARP1	4449842	4442743	9606.ENSP00000437955	9606.ENSP00000355759	0	0	0	0	0	0.379	0	0.519	0.689
RUNX2	CCNB1	4443746	4434484	9606.ENSP00000360493	9606.ENSP00000256442	0	0	0	0	0.061	0.379	0	0.508	0.688
CASP9	CCNB1	4440164	4434484	9606.ENSP00000330237	9606.ENSP00000256442	0	0	0	0	0	0	0	0.686	0.686
BDNF	CASP3	4448727	4438651	9606.ENSP00000414303	9606.ENSP00000311032	0	0	0	0	0	0	0	0.683	0.683
NQO1	AHR	4439310	4433805	9606.ENSP00000319788	9606.ENSP00000242057	0	0	0	0	0	0	0	0.682	0.682
ACHE	PON1	4437943	4433224	9606.ENSP00000303211	9606.ENSP00000222381	0	0	0	0	0.062	0	0	0.674	0.681
SELE	NOS3	4440292	4437409	9606.ENSP00000331736	9606.ENSP00000297494	0	0	0	0	0.078	0	0	0.669	0.681
MGAM	HK2	4450229	4436875	9606.ENSP00000447378	9606.ENSP00000290573	0	0	0	0	0.061	0	0.65	0.104	0.68
CYP1A1	NR1I3	4445265	4442999	9606.ENSP00000369050	9606.ENSP00000356959	0	0	0	0	0.062	0.085	0	0.656	0.679
PPARG	AHR	4436745	4433805	9606.ENSP00000287820	9606.ENSP00000242057	0	0	0	0	0	0.05	0	0.674	0.677
VEGFA	PLAU	4451310	4444017	9606.ENSP00000478570	9606.ENSP00000361850	0	0	0	0	0.069	0	0	0.666	0.675
CYP1B1	ESR1	4451308	4448358	9606.ENSP00000478561	9606.ENSP00000405330	0	0	0	0	0.073	0.085	0	0.645	0.673
VCAM1	PPARG	4437090	4436745	9606.ENSP00000294728	9606.ENSP00000287820	0	0	0	0	0	0	0	0.673	0.673
FOS	ICAM1	4438204	4435501	9606.ENSP00000306245	9606.ENSP00000264832	0	0	0	0	0	0	0	0.671	0.671
BDNF	CRP	4448727	4434405	9606.ENSP00000414303	9606.ENSP00000255030	0	0	0	0	0	0	0	0.671	0.671
CASP8	IRF1	4442125	4433930	9606.ENSP00000351273	9606.ENSP00000245414	0	0	0	0	0.129	0	0	0.637	0.67
INS	AKR1B1	4446661	4436650	9606.ENSP00000380432	9606.ENSP00000285930	0	0	0	0	0	0	0	0.669	0.669
INS	AR	4446661	4444436	9606.ENSP00000380432	9606.ENSP00000363822	0	0	0	0	0	0	0	0.669	0.669
CRP	PON1	4434405	4433224	9606.ENSP00000255030	9606.ENSP00000222381	0	0	0	0	0.098	0	0	0.649	0.669
FABP1	PPARG	4437198	4436745	9606.ENSP00000295834	9606.ENSP00000287820	0	0	0	0	0	0.393	0	0.474	0.667
ESR1	RELA	4448358	4447098	9606.ENSP00000405330	9606.ENSP00000384273	0	0	0	0	0	0.393	0	0.473	0.666
ESR1	CASP3	4448358	4438651	9606.ENSP00000405330	9606.ENSP00000311032	0	0	0	0	0	0.058	0	0.659	0.665
PPARG	PON1	4436745	4433224	9606.ENSP00000287820	9606.ENSP00000222381	0	0	0	0	0.061	0	0	0.655	0.662
FOS	CCNB1	4438204	4434484	9606.ENSP00000306245	9606.ENSP00000256442	0	0	0	0	0	0.125	0	0.63	0.662
CASP8	CCND1	4442125	4433391	9606.ENSP00000351273	9606.ENSP00000227507	0	0	0	0	0	0	0	0.66	0.66
GSTP1	AR	4446837	4444436	9606.ENSP00000381607	9606.ENSP00000363822	0	0	0	0	0	0.064	0	0.65	0.659
VEGFA	ALOX5	4451310	4444382	9606.ENSP00000478570	9606.ENSP00000363512	0	0	0	0	0	0	0	0.658	0.658
BDNF	ACHE	4448727	4437943	9606.ENSP00000414303	9606.ENSP00000303211	0	0	0	0	0.052	0	0	0.653	0.657
CAV1	ICAM1	4440933	4435501	9606.ENSP00000339191	9606.ENSP00000264832	0	0	0	0	0	0	0	0.656	0.656
CHEK2	AR	4445704	4444436	9606.ENSP00000372023	9606.ENSP00000363822	0	0	0	0	0	0	0	0.656	0.656
RUNX2	FOS	4443746	4438204	9606.ENSP00000360493	9606.ENSP00000306245	0	0	0	0	0	0.294	0	0.53	0.653
POR	NQO1	4449076	4439310	9606.ENSP00000419970	9606.ENSP00000319788	0	0	0	0	0	0	0	0.652	0.652
ESR1	ERBB3	4448358	4435741	9606.ENSP00000405330	9606.ENSP00000267101	0	0	0	0	0	0.077	0	0.638	0.651
IL6	CASP8	4447254	4442125	9606.ENSP00000385675	9606.ENSP00000351273	0	0	0	0	0.061	0	0	0.642	0.65
SLC2A4	UCP2	4439402	4438746	9606.ENSP00000320935	9606.ENSP00000312029	0	0	0	0	0.063	0	0	0.642	0.65
MYC	CASP9	4451407	4440164	9606.ENSP00000479618	9606.ENSP00000330237	0	0	0	0	0	0	0	0.649	0.649
F7	CRP	4444589	4434405	9606.ENSP00000364731	9606.ENSP00000255030	0	0	0	0	0.085	0	0	0.631	0.648
ACACA	PPARG	4451758	4436745	9606.ENSP00000483300	9606.ENSP00000287820	0	0	0	0	0.049	0	0	0.645	0.648
HIF1A	IGF2	4449842	4447717	9606.ENSP00000437955	9606.ENSP00000391826	0	0	0	0	0	0	0	0.648	0.648
AR	FOS	4444436	4438204	9606.ENSP00000363822	9606.ENSP00000306245	0	0	0	0	0.055	0.266	0	0.532	0.647
GSTP1	AKR1B1	4446837	4436650	9606.ENSP00000381607	9606.ENSP00000285930	0	0	0	0	0.11	0	0	0.618	0.646
EGFR	AHR	4436186	4433805	9606.ENSP00000275493	9606.ENSP00000242057	0	0	0	0	0.061	0	0	0.635	0.643
INS	CTSD	4446661	4433665	9606.ENSP00000380432	9606.ENSP00000236671	0	0	0	0	0	0.379	0	0.448	0.642
VEGFA	PTGER3	4451310	4441881	9606.ENSP00000478570	9606.ENSP00000349003	0	0	0	0	0	0	0	0.642	0.642
INS	SELE	4446661	4440292	9606.ENSP00000380432	9606.ENSP00000331736	0	0	0	0	0	0	0	0.64	0.64
INS	ALOX5	4446661	4444382	9606.ENSP00000380432	9606.ENSP00000363512	0	0	0	0	0	0	0	0.64	0.64
INS	ADRA1A	4446661	4445417	9606.ENSP00000380432	9606.ENSP00000369960	0	0	0	0	0	0	0	0.64	0.64
MYC	CASP8	4451407	4442125	9606.ENSP00000479618	9606.ENSP00000351273	0	0	0	0	0.052	0	0	0.635	0.639
MYC	AHR	4451407	4433805	9606.ENSP00000479618	9606.ENSP00000242057	0	0	0	0	0	0	0	0.638	0.638
AKR1B1	ICAM1	4436650	4435501	9606.ENSP00000285930	9606.ENSP00000264832	0	0	0	0	0	0	0	0.637	0.638
INS	HSPB1	4446661	4434059	9606.ENSP00000380432	9606.ENSP00000248553	0	0	0	0	0	0.379	0	0.441	0.638
CYP1B1	IL6	4451308	4447254	9606.ENSP00000478561	9606.ENSP00000385675	0	0	0	0	0.086	0	0	0.618	0.636
GSK3B	CASP3	4439717	4438651	9606.ENSP00000324806	9606.ENSP00000311032	0	0	0	0	0.059	0.097	0	0.605	0.636
PRKCA	CAV1	4448494	4440933	9606.ENSP00000408695	9606.ENSP00000339191	0	0	0	0	0	0	0	0.635	0.635
CHRNA2	ACHE	4447196	4437943	9606.ENSP00000385026	9606.ENSP00000303211	0	0	0	0	0.049	0	0	0.631	0.634
GSTP1	EGFR	4446837	4436186	9606.ENSP00000381607	9606.ENSP00000275493	0	0	0	0	0.068	0.379	0	0.419	0.634
PGR	CTSD	4439740	4433665	9606.ENSP00000325120	9606.ENSP00000236671	0	0	0	0	0	0	0	0.63	0.63
VEGFA	PGR	4451310	4439740	9606.ENSP00000478570	9606.ENSP00000325120	0	0	0	0	0	0	0	0.63	0.63
IL6	PARP1	4447254	4442743	9606.ENSP00000385675	9606.ENSP00000355759	0	0	0	0	0	0	0	0.628	0.628
MYC	CHEK2	4451407	4445704	9606.ENSP00000479618	9606.ENSP00000372023	0	0	0	0	0.051	0	0	0.623	0.627
VEGFA	PRKCA	4451310	4448494	9606.ENSP00000478570	9606.ENSP00000408695	0	0	0	0	0	0	0	0.627	0.627
CASP3	NFKBIA	4438651	4432983	9606.ENSP00000311032	9606.ENSP00000216797	0	0	0	0	0	0.178	0	0.564	0.626
BDNF	AR	4448727	4444436	9606.ENSP00000414303	9606.ENSP00000363822	0	0	0	0	0	0	0	0.625	0.625
CASP9	GSK3B	4440164	4439717	9606.ENSP00000330237	9606.ENSP00000324806	0	0	0	0	0.052	0.097	0	0.597	0.625
VEGFA	RELA	4451310	4447098	9606.ENSP00000478570	9606.ENSP00000384273	0	0	0	0	0	0.313	0	0.477	0.625
CASP3	ICAM1	4438651	4435501	9606.ENSP00000311032	9606.ENSP00000264832	0	0	0	0	0	0	0	0.62	0.62
HIF1A	AR	4449842	4444436	9606.ENSP00000437955	9606.ENSP00000363822	0	0	0	0	0	0.413	0	0.378	0.619
BCL2	CTSD	4446777	4433665	9606.ENSP00000381185	9606.ENSP00000236671	0	0	0	0	0	0	0.6	0.087	0.619
NQO1	FOS	4439310	4438204	9606.ENSP00000319788	9606.ENSP00000306245	0	0	0	0	0	0.379	0	0.412	0.619
SLC2A2	FABP1	4439612	4437198	9606.ENSP00000323568	9606.ENSP00000295834	0	0	0	0	0.44	0	0	0.348	0.619
ITGB2	ALOX5	4446737	4444382	9606.ENSP00000380948	9606.ENSP00000363512	0	0	0	0	0.548	0	0	0.189	0.617
INS	RUNX2	4446661	4443746	9606.ENSP00000380432	9606.ENSP00000360493	0	0	0	0	0	0	0	0.614	0.614
NFE2L2	GSK3B	4446632	4439717	9606.ENSP00000380252	9606.ENSP00000324806	0	0	0	0	0	0.401	0	0.377	0.611
EGFR	RAF1	4436186	4434195	9606.ENSP00000275493	9606.ENSP00000251849	0	0	0	0.575	0	0.431	0	0.754	0.611
CHEK2	RB1	4445704	4435747	9606.ENSP00000372023	9606.ENSP00000267163	0	0	0	0	0.086	0.348	0	0.399	0.61
RELA	VCAM1	4447098	4437090	9606.ENSP00000384273	9606.ENSP00000294728	0	0	0	0	0	0.281	0	0.481	0.61
NFE2L2	ERBB2	4446632	4435897	9606.ENSP00000380252	9606.ENSP00000269571	0	0	0	0	0	0	0	0.61	0.61
ACACA	LPL	4451758	4438536	9606.ENSP00000483300	9606.ENSP00000309757	0	0	0	0	0.059	0	0	0.6	0.607
CHEK2	CASP3	4445704	4438651	9606.ENSP00000372023	9606.ENSP00000311032	0	0	0	0	0.061	0	0	0.599	0.607
CASP9	EGFR	4440164	4436186	9606.ENSP00000330237	9606.ENSP00000275493	0	0	0	0	0	0.05	0	0.601	0.605
PPARG	CCND1	4436745	4433391	9606.ENSP00000287820	9606.ENSP00000227507	0	0	0	0	0	0.05	0	0.601	0.605
INS	RB1	4446661	4435747	9606.ENSP00000380432	9606.ENSP00000267163	0	0	0	0	0	0.379	0	0.387	0.603
ITGB2	SELE	4446737	4440292	9606.ENSP00000380948	9606.ENSP00000331736	0	0	0	0	0.078	0	0	0.586	0.601
IRF1	NFKBIA	4433930	4432983	9606.ENSP00000245414	9606.ENSP00000216797	0	0	0	0	0.274	0	0	0.473	0.601
BDNF	ICAM1	4448727	4435501	9606.ENSP00000414303	9606.ENSP00000264832	0	0	0	0	0	0	0	0.6	0.6
INS	PGR	4446661	4439740	9606.ENSP00000380432	9606.ENSP00000325120	0	0	0	0	0	0	0	0.598	0.598
NCOA1	AHR	4447214	4433805	9606.ENSP00000385216	9606.ENSP00000242057	0	0	0	0.547	0	0.528	0	0.356	0.598
MYC	RUNX2	4451407	4443746	9606.ENSP00000479618	9606.ENSP00000360493	0	0	0	0	0	0.176	0	0.531	0.597
RELA	AHR	4447098	4433805	9606.ENSP00000384273	9606.ENSP00000242057	0	0	0	0	0	0.379	0	0.378	0.597
HIF1A	RELA	4449842	4447098	9606.ENSP00000437955	9606.ENSP00000384273	0	0	0	0	0	0.379	0	0.378	0.597
UCP2	LPL	4438746	4438536	9606.ENSP00000312029	9606.ENSP00000309757	0	0	0	0	0.062	0	0	0.587	0.596
PPARG	ERBB2	4436745	4435897	9606.ENSP00000287820	9606.ENSP00000269571	0	0	0	0	0	0.077	0	0.58	0.596
INS	RAF1	4446661	4434195	9606.ENSP00000380432	9606.ENSP00000251849	0	0	0	0	0	0.262	0	0.474	0.595
CASP8	CCNB1	4442125	4434484	9606.ENSP00000351273	9606.ENSP00000256442	0	0	0	0	0	0	0	0.595	0.595
AR	RAF1	4444436	4434195	9606.ENSP00000363822	9606.ENSP00000251849	0	0	0	0	0	0.407	0	0.346	0.595
BDNF	GSK3B	4448727	4439717	9606.ENSP00000414303	9606.ENSP00000324806	0	0	0	0	0	0.185	0	0.522	0.594
EGFR	IRF1	4436186	4433930	9606.ENSP00000275493	9606.ENSP00000245414	0	0	0	0	0	0	0	0.593	0.593
NCOA1	ERBB2	4447214	4435897	9606.ENSP00000385216	9606.ENSP00000269571	0	0	0	0	0.063	0	0	0.582	0.591
RELA	SELE	4447098	4440292	9606.ENSP00000384273	9606.ENSP00000331736	0	0	0	0	0	0.328	0	0.416	0.59
IL6	LPL	4447254	4438536	9606.ENSP00000385675	9606.ENSP00000309757	0	0	0	0	0	0	0	0.59	0.59
CASP8	NFKBIA	4442125	4432983	9606.ENSP00000351273	9606.ENSP00000216797	0	0	0	0	0.061	0.178	0	0.51	0.588
VEGFA	RAF1	4451310	4434195	9606.ENSP00000478570	9606.ENSP00000251849	0	0	0	0	0	0	0	0.588	0.588
NCOA2	AHR	4448095	4433805	9606.ENSP00000399968	9606.ENSP00000242057	0	0	0	0.546	0	0.528	0	0.31	0.588
ERBB2	CCNB1	4435897	4434484	9606.ENSP00000269571	9606.ENSP00000256442	0	0	0	0	0	0.085	0	0.567	0.587
RUNX2	EGFR	4443746	4436186	9606.ENSP00000360493	9606.ENSP00000275493	0	0	0	0	0	0	0	0.587	0.587
ESR1	AR	4448358	4444436	9606.ENSP00000405330	9606.ENSP00000363822	0	0	0	0.656	0.062	0.379	0	0.936	0.587
VEGFA	FOS	4451310	4438204	9606.ENSP00000478570	9606.ENSP00000306245	0	0	0	0	0	0	0	0.586	0.586
PGR	ERBB3	4439740	4435741	9606.ENSP00000325120	9606.ENSP00000267101	0	0	0	0	0.071	0.077	0	0.556	0.586
CASP3	FOS	4438651	4438204	9606.ENSP00000311032	9606.ENSP00000306245	0	0	0	0	0	0	0	0.585	0.585
MYC	BIRC5	4451407	4437778	9606.ENSP00000479618	9606.ENSP00000301633	0	0	0	0	0.102	0.084	0	0.535	0.585
PTGS1	PTGER3	4442503	4441881	9606.ENSP00000354612	9606.ENSP00000349003	0	0	0	0	0	0.056	0	0.577	0.584
MYC	HK2	4451407	4436875	9606.ENSP00000479618	9606.ENSP00000290573	0	0	0	0	0.124	0	0	0.544	0.583
BIRC5	CCND1	4437778	4433391	9606.ENSP00000301633	9606.ENSP00000227507	0	0	0	0	0.085	0	0	0.563	0.583
MYC	NCOA1	4451407	4447214	9606.ENSP00000479618	9606.ENSP00000385216	0	0	0	0	0	0	0	0.58	0.581
VEGFA	CASP9	4451310	4440164	9606.ENSP00000478570	9606.ENSP00000330237	0	0	0	0	0	0	0	0.581	0.581
HSF1	PARP1	4449594	4442743	9606.ENSP00000431512	9606.ENSP00000355759	0	0	0	0	0	0	0	0.579	0.579
GSK3B	PPARG	4439717	4436745	9606.ENSP00000324806	9606.ENSP00000287820	0	0	0	0	0	0.085	0	0.558	0.578
CASP3	PPARG	4438651	4436745	9606.ENSP00000311032	9606.ENSP00000287820	0	0	0	0	0	0.058	0	0.571	0.578
IL6	CASP9	4447254	4440164	9606.ENSP00000385675	9606.ENSP00000330237	0	0	0	0	0	0	0	0.578	0.578
MYC	IGF2	4451407	4447717	9606.ENSP00000479618	9606.ENSP00000391826	0	0	0	0	0	0	0	0.578	0.578
FOS	RB1	4438204	4435747	9606.ENSP00000306245	9606.ENSP00000267163	0	0	0	0	0	0.379	0	0.348	0.577
BCL2	CASP9	4446777	4440164	9606.ENSP00000381185	9606.ENSP00000330237	0	0	0	0	0	0.168	0	0.512	0.577
ICAM1	AHR	4435501	4433805	9606.ENSP00000264832	9606.ENSP00000242057	0	0	0	0	0.076	0	0	0.56	0.576
RUNX2	LPL	4443746	4438536	9606.ENSP00000360493	9606.ENSP00000309757	0	0	0	0	0	0	0	0.574	0.574
IL6	GSK3B	4447254	4439717	9606.ENSP00000385675	9606.ENSP00000324806	0	0	0	0	0	0	0	0.573	0.573
ERBB2	CTSD	4435897	4433665	9606.ENSP00000269571	9606.ENSP00000236671	0	0	0	0	0	0	0	0.573	0.573
PARP1	EGFR	4442743	4436186	9606.ENSP00000355759	9606.ENSP00000275493	0	0	0	0	0	0.099	0	0.546	0.573
GSTP1	INS	4446837	4446661	9606.ENSP00000381607	9606.ENSP00000380432	0	0	0	0	0	0	0	0.573	0.573
UCP2	HK2	4438746	4436875	9606.ENSP00000312029	9606.ENSP00000290573	0	0	0	0	0.063	0	0	0.561	0.571
IRF1	AHR	4433930	4433805	9606.ENSP00000245414	9606.ENSP00000242057	0	0	0	0	0.065	0	0	0.557	0.569
NCOA2	EGFR	4448095	4436186	9606.ENSP00000399968	9606.ENSP00000275493	0	0	0	0	0.062	0	0	0.557	0.567
INS	CASP9	4446661	4440164	9606.ENSP00000380432	9606.ENSP00000330237	0	0	0	0	0	0	0	0.566	0.566
HIF1A	NCOA2	4449842	4448095	9606.ENSP00000437955	9606.ENSP00000399968	0	0	0	0.548	0	0.529	0	0.209	0.566
NQO1	CASP3	4439310	4438651	9606.ENSP00000319788	9606.ENSP00000311032	0	0	0	0	0	0	0	0.566	0.566
CASP9	HSPB1	4440164	4434059	9606.ENSP00000330237	9606.ENSP00000248553	0	0	0	0	0	0.064	0	0.553	0.564
RAF1	CCND1	4434195	4433391	9606.ENSP00000251849	9606.ENSP00000227507	0	0	0	0	0.05	0	0	0.56	0.564
CRP	CETP	4434405	4432783	9606.ENSP00000255030	9606.ENSP00000200676	0	0	0	0	0.064	0	0	0.553	0.563
IL6	ALOX5	4447254	4444382	9606.ENSP00000385675	9606.ENSP00000363512	0	0	0	0	0	0	0	0.563	0.563
LPL	CRP	4438536	4434405	9606.ENSP00000309757	9606.ENSP00000255030	0	0	0	0	0	0	0	0.563	0.563
FOS	NFKBIA	4438204	4432983	9606.ENSP00000306245	9606.ENSP00000216797	0	0	0	0	0.097	0.077	0	0.518	0.563
ESR1	GSTP1	4448358	4446837	9606.ENSP00000405330	9606.ENSP00000381607	0	0	0	0	0	0.064	0	0.552	0.562
BDNF	UCP2	4448727	4438746	9606.ENSP00000414303	9606.ENSP00000312029	0	0	0	0	0	0	0	0.561	0.561
IL6	NFE2L2	4447254	4446632	9606.ENSP00000385675	9606.ENSP00000380252	0	0	0	0	0	0	0	0.56	0.56
HIF1A	RUNX2	4449842	4443746	9606.ENSP00000437955	9606.ENSP00000360493	0	0	0	0	0	0.379	0	0.322	0.56
VEGFA	CASP8	4451310	4442125	9606.ENSP00000478570	9606.ENSP00000351273	0	0	0	0	0	0	0	0.559	0.559
HIF1A	CASP3	4449842	4438651	9606.ENSP00000437955	9606.ENSP00000311032	0	0	0	0	0	0	0	0.559	0.559
INS	PON1	4446661	4433224	9606.ENSP00000380432	9606.ENSP00000222381	0	0	0	0	0	0	0	0.559	0.559
PRKCA	IL6	4448494	4447254	9606.ENSP00000408695	9606.ENSP00000385675	0	0	0	0	0	0	0	0.558	0.558
IRF1	CCND1	4433930	4433391	9606.ENSP00000245414	9606.ENSP00000227507	0	0	0	0	0	0	0	0.558	0.558
CAV1	AHR	4440933	4433805	9606.ENSP00000339191	9606.ENSP00000242057	0	0	0	0	0.064	0	0	0.546	0.557
RELA	CASP3	4447098	4438651	9606.ENSP00000384273	9606.ENSP00000311032	0	0	0	0	0	0	0	0.557	0.557
CASP3	CTSD	4438651	4433665	9606.ENSP00000311032	9606.ENSP00000236671	0	0	0	0	0	0	0	0.556	0.556
PTGS1	NOS3	4442503	4437409	9606.ENSP00000354612	9606.ENSP00000297494	0	0	0	0	0	0.193	0	0.473	0.556
IL6	PTGS1	4447254	4442503	9606.ENSP00000385675	9606.ENSP00000354612	0	0	0	0	0.094	0	0	0.53	0.556
ESR1	IGF2	4448358	4447717	9606.ENSP00000405330	9606.ENSP00000391826	0	0	0	0	0	0	0	0.556	0.556
NCOA1	CCND1	4447214	4433391	9606.ENSP00000385216	9606.ENSP00000227507	0	0	0	0	0	0.379	0	0.31	0.553
VEGFA	IRF1	4451310	4433930	9606.ENSP00000478570	9606.ENSP00000245414	0	0	0	0	0	0	0	0.553	0.553
HIF1A	IL6	4449842	4447254	9606.ENSP00000437955	9606.ENSP00000385675	0	0	0	0	0.065	0	0	0.539	0.55
IGFBP3	CCND1	4445494	4433391	9606.ENSP00000370473	9606.ENSP00000227507	0	0	0	0	0.141	0.132	0	0.444	0.549
PARP1	CCNB1	4442743	4434484	9606.ENSP00000355759	9606.ENSP00000256442	0	0	0	0	0.201	0	0	0.458	0.549
FOS	RAF1	4438204	4434195	9606.ENSP00000306245	9606.ENSP00000251849	0	0	0	0	0	0.08	0	0.529	0.549
ESR1	CYP3A4	4448358	4440831	9606.ENSP00000405330	9606.ENSP00000337915	0	0	0	0	0.049	0.085	0	0.522	0.548
IGFBP3	CTSD	4445494	4433665	9606.ENSP00000370473	9606.ENSP00000236671	0	0	0	0	0.065	0.379	0	0.284	0.547
PARP1	PGR	4442743	4439740	9606.ENSP00000355759	9606.ENSP00000325120	0	0	0	0	0	0.32	0	0.361	0.547
IL6	PLAU	4447254	4444017	9606.ENSP00000385675	9606.ENSP00000361850	0	0	0	0	0.134	0	0	0.496	0.544
FOS	ERBB2	4438204	4435897	9606.ENSP00000306245	9606.ENSP00000269571	0	0	0	0	0	0.082	0	0.523	0.543
MYC	ERBB3	4451407	4435741	9606.ENSP00000479618	9606.ENSP00000267101	0	0	0	0	0	0	0	0.542	0.542
CYP1B1	POR	4451308	4449076	9606.ENSP00000478561	9606.ENSP00000419970	0.042	0	0	0	0.051	0.053	0	0.531	0.542
CASP9	ERBB2	4440164	4435897	9606.ENSP00000330237	9606.ENSP00000269571	0	0	0	0	0	0.05	0	0.538	0.542
LPL	FOS	4438536	4438204	9606.ENSP00000309757	9606.ENSP00000306245	0	0	0	0	0	0	0	0.541	0.541
SLC2A4	NOS3	4439402	4437409	9606.ENSP00000320935	9606.ENSP00000297494	0	0	0	0	0.062	0	0	0.531	0.541
GSTP1	NFE2L2	4446837	4446632	9606.ENSP00000381607	9606.ENSP00000380252	0	0	0	0	0	0	0	0.539	0.539
EGFR	ICAM1	4436186	4435501	9606.ENSP00000275493	9606.ENSP00000264832	0	0	0	0	0	0.112	0	0.502	0.539
HIF1A	ERBB2	4449842	4435897	9606.ENSP00000437955	9606.ENSP00000269571	0	0	0	0	0	0	0	0.539	0.539
MGAM	ACHE	4450229	4437943	9606.ENSP00000447378	9606.ENSP00000303211	0.044	0	0	0	0.053	0	0	0.532	0.539
IGFBP3	NOS3	4445494	4437409	9606.ENSP00000370473	9606.ENSP00000297494	0	0	0	0	0.061	0	0	0.527	0.537
ITGB2	EGFR	4446737	4436186	9606.ENSP00000380948	9606.ENSP00000275493	0	0	0	0	0.051	0.42	0	0.225	0.537
PRKCA	PPARG	4448494	4436745	9606.ENSP00000408695	9606.ENSP00000287820	0	0	0	0	0	0.379	0	0.286	0.537
IL6	NQO1	4447254	4439310	9606.ENSP00000385675	9606.ENSP00000319788	0	0	0	0	0	0	0	0.536	0.536
CASP3	RAF1	4438651	4434195	9606.ENSP00000311032	9606.ENSP00000251849	0	0	0	0	0	0.064	0	0.523	0.534
ESR1	CCNB1	4448358	4434484	9606.ENSP00000405330	9606.ENSP00000256442	0	0	0	0	0	0.05	0	0.53	0.534
CASP3	ACHE	4438651	4437943	9606.ENSP00000311032	9606.ENSP00000303211	0	0	0	0	0	0	0	0.533	0.533
INS	CASP8	4446661	4442125	9606.ENSP00000380432	9606.ENSP00000351273	0	0	0	0	0	0	0	0.532	0.532
INS	F7	4446661	4444589	9606.ENSP00000380432	9606.ENSP00000364731	0	0	0	0	0	0	0	0.531	0.531
VCAM1	NFKBIA	4437090	4432983	9606.ENSP00000294728	9606.ENSP00000216797	0	0	0	0	0	0	0	0.531	0.531
CASP8	ERBB2	4442125	4435897	9606.ENSP00000351273	9606.ENSP00000269571	0	0	0	0	0	0.05	0	0.526	0.53
PPARG	CRP	4436745	4434405	9606.ENSP00000287820	9606.ENSP00000255030	0	0	0	0	0	0	0	0.53	0.53
RELA	CCNB1	4447098	4434484	9606.ENSP00000384273	9606.ENSP00000256442	0	0	0	0	0.048	0.379	0	0.269	0.53
INS	NFE2L2	4446661	4446632	9606.ENSP00000380432	9606.ENSP00000380252	0	0	0	0	0	0	0	0.53	0.53
PARP1	CCND1	4442743	4433391	9606.ENSP00000355759	9606.ENSP00000227507	0	0	0	0	0	0	0	0.53	0.53
ESR1	IGFBP3	4448358	4445494	9606.ENSP00000405330	9606.ENSP00000370473	0	0	0	0	0	0	0	0.53	0.53
IL6	RUNX2	4447254	4443746	9606.ENSP00000385675	9606.ENSP00000360493	0	0	0	0	0	0	0	0.529	0.529
VEGFA	HSPB1	4451310	4434059	9606.ENSP00000478570	9606.ENSP00000248553	0	0	0	0	0.049	0.132	0	0.476	0.529
AR	VCAM1	4444436	4437090	9606.ENSP00000363822	9606.ENSP00000294728	0	0	0	0	0	0	0	0.528	0.528
CASP3	VCAM1	4438651	4437090	9606.ENSP00000311032	9606.ENSP00000294728	0	0	0	0	0.053	0	0	0.522	0.528
INS	ACHE	4446661	4437943	9606.ENSP00000380432	9606.ENSP00000303211	0	0	0	0	0	0	0	0.528	0.528
RASSF1	ERBB2	4441940	4435897	9606.ENSP00000349547	9606.ENSP00000269571	0	0	0	0	0	0.139	0	0.473	0.526
EGFR	CTSD	4436186	4433665	9606.ENSP00000275493	9606.ENSP00000236671	0	0	0	0	0	0.099	0	0.495	0.526
ADRA1A	NOS3	4445417	4437409	9606.ENSP00000369960	9606.ENSP00000297494	0	0	0	0	0	0	0	0.526	0.526
HSPB1	NFKBIA	4434059	4432983	9606.ENSP00000248553	9606.ENSP00000216797	0	0	0	0	0	0.379	0	0.266	0.524
RASA1	ERBB2	4436131	4435897	9606.ENSP00000274376	9606.ENSP00000269571	0	0	0	0	0	0.31	0	0.338	0.524
CASP8	BIRC5	4442125	4437778	9606.ENSP00000351273	9606.ENSP00000301633	0	0	0	0	0.06	0.181	0	0.428	0.521
MYC	RASSF1	4451407	4441940	9606.ENSP00000479618	9606.ENSP00000349547	0	0	0	0	0.058	0.139	0	0.457	0.521
CASP9	NFKBIA	4440164	4432983	9606.ENSP00000330237	9606.ENSP00000216797	0	0	0	0	0.061	0.178	0	0.428	0.52
SLC2A2	HK2	4439612	4436875	9606.ENSP00000323568	9606.ENSP00000290573	0	0	0	0	0.063	0	0	0.509	0.52
EGFR	RB1	4436186	4435747	9606.ENSP00000275493	9606.ENSP00000267163	0	0	0	0	0	0.054	0	0.514	0.52
NCOA2	IL6	4448095	4447254	9606.ENSP00000399968	9606.ENSP00000385675	0	0	0	0	0	0	0	0.519	0.519
PARP1	ERBB2	4442743	4435897	9606.ENSP00000355759	9606.ENSP00000269571	0	0	0	0	0	0	0	0.519	0.519
HIF1A	CCND1	4449842	4433391	9606.ENSP00000437955	9606.ENSP00000227507	0	0	0	0	0	0	0	0.517	0.517
MYC	CAV1	4451407	4440933	9606.ENSP00000479618	9606.ENSP00000339191	0	0	0	0	0.076	0	0	0.499	0.517
NOS3	PON1	4437409	4433224	9606.ENSP00000297494	9606.ENSP00000222381	0	0	0	0	0	0	0	0.516	0.516
RUNX2	CCND1	4443746	4433391	9606.ENSP00000360493	9606.ENSP00000227507	0	0	0	0	0	0	0	0.515	0.515
BCL2	PARP1	4446777	4442743	9606.ENSP00000381185	9606.ENSP00000355759	0	0	0	0	0	0.379	0	0.249	0.514
PGR	FOS	4439740	4438204	9606.ENSP00000325120	9606.ENSP00000306245	0	0	0	0	0	0.098	0	0.483	0.514
PPARG	RAF1	4436745	4434195	9606.ENSP00000287820	9606.ENSP00000251849	0	0	0	0	0	0.085	0	0.491	0.514
HIF1A	PPARG	4449842	4436745	9606.ENSP00000437955	9606.ENSP00000287820	0	0	0	0	0.062	0.095	0	0.473	0.513
PRKCA	INS	4448494	4446661	9606.ENSP00000408695	9606.ENSP00000380432	0	0	0	0	0	0	0	0.513	0.513
RB1	AHR	4435747	4433805	9606.ENSP00000267163	9606.ENSP00000242057	0	0	0	0	0	0.454	0	0.145	0.513
ACACA	SLC2A4	4451758	4439402	9606.ENSP00000483300	9606.ENSP00000320935	0	0	0	0	0.062	0	0	0.501	0.511
IL6	HSPB1	4447254	4434059	9606.ENSP00000385675	9606.ENSP00000248553	0	0	0	0	0	0	0	0.511	0.511
TBXA2R	PTGS1	4447795	4442503	9606.ENSP00000393333	9606.ENSP00000354612	0	0	0	0	0	0.056	0	0.504	0.511
GSTP1	AHR	4446837	4433805	9606.ENSP00000381607	9606.ENSP00000242057	0	0	0	0	0	0	0	0.51	0.51
INS	AHR	4446661	4433805	9606.ENSP00000380432	9606.ENSP00000242057	0	0	0	0	0	0	0	0.51	0.51
SLC2A2	PPARG	4439612	4436745	9606.ENSP00000323568	9606.ENSP00000287820	0	0	0	0	0	0	0	0.51	0.51
NFE2L2	GSTM1	4446632	4438694	9606.ENSP00000380252	9606.ENSP00000311469	0	0	0	0	0	0	0	0.509	0.509
CASP9	RB1	4440164	4435747	9606.ENSP00000330237	9606.ENSP00000267163	0	0	0	0	0	0.32	0	0.307	0.509
ESR1	CASP8	4448358	4442125	9606.ENSP00000405330	9606.ENSP00000351273	0	0	0	0	0	0.058	0	0.501	0.509
CHEK2	CASP9	4445704	4440164	9606.ENSP00000372023	9606.ENSP00000330237	0	0	0	0	0.061	0	0	0.498	0.508
NFE2L2	SLC2A4	4446632	4439402	9606.ENSP00000380252	9606.ENSP00000320935	0	0	0	0	0	0	0	0.508	0.508
HSF1	IL6	4449594	4447254	9606.ENSP00000431512	9606.ENSP00000385675	0	0	0	0	0	0	0	0.508	0.508
CHEK2	CASP8	4445704	4442125	9606.ENSP00000372023	9606.ENSP00000351273	0	0	0	0	0.061	0	0	0.496	0.506
CASP8	RB1	4442125	4435747	9606.ENSP00000351273	9606.ENSP00000267163	0	0	0	0	0	0.32	0	0.303	0.506
RELA	PGR	4447098	4439740	9606.ENSP00000384273	9606.ENSP00000325120	0	0	0	0	0	0.393	0	0.217	0.505
IL6	ACHE	4447254	4437943	9606.ENSP00000385675	9606.ENSP00000303211	0	0	0	0	0	0	0	0.503	0.503
IL6	CAV1	4447254	4440933	9606.ENSP00000385675	9606.ENSP00000339191	0	0	0	0	0.088	0	0	0.477	0.503
HSPB1	CTSD	4434059	4433665	9606.ENSP00000248553	9606.ENSP00000236671	0	0	0	0	0.098	0	0	0.472	0.503
EGFR	TP63	4436186	4435488	9606.ENSP00000275493	9606.ENSP00000264731	0	0	0	0	0	0	0	0.502	0.502
HIF1A	HK2	4449842	4436875	9606.ENSP00000437955	9606.ENSP00000290573	0	0	0	0	0	0	0	0.501	0.501
PLAU	PON1	4444017	4433224	9606.ENSP00000361850	9606.ENSP00000222381	0	0	0	0	0	0	0	0.501	0.501
HIF1A	RB1	4449842	4435747	9606.ENSP00000437955	9606.ENSP00000267163	0	0	0	0	0.061	0.379	0	0.211	0.5
PLAU	ERBB2	4444017	4435897	9606.ENSP00000361850	9606.ENSP00000269571	0	0	0	0	0.055	0	0	0.491	0.498
MYC	SLC2A4	4451407	4439402	9606.ENSP00000479618	9606.ENSP00000320935	0	0	0	0	0	0	0	0.498	0.498
IGFBP3	CRP	4445494	4434405	9606.ENSP00000370473	9606.ENSP00000255030	0	0	0	0	0	0	0	0.497	0.497
NCOA2	FOS	4448095	4438204	9606.ENSP00000399968	9606.ENSP00000306245	0	0	0	0	0	0.359	0	0.247	0.497
HIF1A	BCL2	4449842	4446777	9606.ENSP00000437955	9606.ENSP00000381185	0	0	0	0	0	0.357	0	0.25	0.497
MYC	TP63	4451407	4435488	9606.ENSP00000479618	9606.ENSP00000264731	0	0	0	0	0	0.129	0	0.445	0.496
MYC	PPARG	4451407	4436745	9606.ENSP00000479618	9606.ENSP00000287820	0	0	0	0	0	0	0	0.496	0.496
ESR1	CASP9	4448358	4440164	9606.ENSP00000405330	9606.ENSP00000330237	0	0	0	0	0	0.058	0	0.483	0.492
CASP8	RASSF1	4442125	4441940	9606.ENSP00000351273	9606.ENSP00000349547	0	0	0	0	0	0	0	0.492	0.491
VEGFA	AKR1B1	4451310	4436650	9606.ENSP00000478570	9606.ENSP00000285930	0	0	0	0	0	0	0	0.491	0.491
IGFBP3	AR	4445494	4444436	9606.ENSP00000370473	9606.ENSP00000363822	0	0	0	0	0	0.107	0	0.453	0.49
RELA	TP63	4447098	4435488	9606.ENSP00000384273	9606.ENSP00000264731	0	0	0	0	0	0.379	0	0.213	0.49
GSTM1	PON1	4438694	4433224	9606.ENSP00000311469	9606.ENSP00000222381	0	0	0	0	0.061	0	0	0.479	0.489
PLAU	CTSD	4444017	4433665	9606.ENSP00000361850	9606.ENSP00000236671	0	0	0	0	0.065	0	0	0.475	0.488
SLC2A4	CRP	4439402	4434405	9606.ENSP00000320935	9606.ENSP00000255030	0	0	0	0	0.049	0	0	0.483	0.488
GSK3B	SLC2A4	4439717	4439402	9606.ENSP00000324806	9606.ENSP00000320935	0	0	0	0	0	0.127	0	0.437	0.488
SLC2A2	UCP2	4439612	4438746	9606.ENSP00000323568	9606.ENSP00000312029	0	0	0	0	0.05	0	0	0.482	0.487
NOS3	AKR1B1	4437409	4436650	9606.ENSP00000297494	9606.ENSP00000285930	0	0	0	0	0	0	0	0.486	0.486
CAV1	RASA1	4440933	4436131	9606.ENSP00000339191	9606.ENSP00000274376	0	0	0	0	0	0.379	0	0.206	0.485
FOS	IRF1	4438204	4433930	9606.ENSP00000306245	9606.ENSP00000245414	0	0	0	0	0.063	0	0	0.473	0.485
ACACA	GSK3B	4451758	4439717	9606.ENSP00000483300	9606.ENSP00000324806	0	0	0	0	0.061	0.076	0	0.452	0.484
RASSF1	GSK3B	4441940	4439717	9606.ENSP00000349547	9606.ENSP00000324806	0	0	0	0	0.063	0.379	0	0.185	0.484
INS	PARP1	4446661	4442743	9606.ENSP00000380432	9606.ENSP00000355759	0	0	0	0	0	0	0	0.481	0.481
BDNF	IGF2	4448727	4447717	9606.ENSP00000414303	9606.ENSP00000391826	0	0	0	0	0	0	0	0.481	0.481
MYC	HSPB1	4451407	4434059	9606.ENSP00000479618	9606.ENSP00000248553	0	0	0	0	0	0.099	0	0.445	0.478
RASA1	ERBB3	4436131	4435741	9606.ENSP00000274376	9606.ENSP00000267101	0	0	0	0	0	0.31	0	0.274	0.478
ADRA1A	FOS	4445417	4438204	9606.ENSP00000369960	9606.ENSP00000306245	0	0	0	0	0	0	0	0.477	0.477
TP63	CCND1	4435488	4433391	9606.ENSP00000264731	9606.ENSP00000227507	0	0	0	0	0.062	0	0	0.466	0.477
IL6	CYP1A1	4447254	4445265	9606.ENSP00000385675	9606.ENSP00000369050	0	0	0	0	0	0	0	0.477	0.477
INS	FABP1	4446661	4437198	9606.ENSP00000380432	9606.ENSP00000295834	0	0	0	0	0	0	0	0.476	0.476
BIRC5	ERBB2	4437778	4435897	9606.ENSP00000301633	9606.ENSP00000269571	0	0	0	0	0	0	0	0.475	0.475
VEGFA	CCNB1	4451310	4434484	9606.ENSP00000478570	9606.ENSP00000256442	0	0	0	0	0	0	0	0.475	0.475
EGFR	NFKBIA	4436186	4432983	9606.ENSP00000275493	9606.ENSP00000216797	0	0	0	0	0	0.176	0	0.389	0.475
CCND1	NFKBIA	4433391	4432983	9606.ENSP00000227507	9606.ENSP00000216797	0	0	0	0	0	0	0	0.475	0.475
BIRC5	EGFR	4437778	4436186	9606.ENSP00000301633	9606.ENSP00000275493	0	0	0	0	0	0	0	0.474	0.474
CIDEA	CASP3	4439342	4438651	9606.ENSP00000320209	9606.ENSP00000311032	0	0	0	0	0.05	0.114	0	0.425	0.474
TBXA2R	ALOX5	4447795	4444382	9606.ENSP00000393333	9606.ENSP00000363512	0	0	0	0	0	0	0	0.474	0.474
RELA	ALOX5	4447098	4444382	9606.ENSP00000384273	9606.ENSP00000363512	0	0	0	0	0	0.379	0	0.189	0.474
MYC	PAM	4451407	4438191	9606.ENSP00000479618	9606.ENSP00000306100	0	0	0	0	0	0.379	0	0.188	0.474
IGFBP3	ERBB2	4445494	4435897	9606.ENSP00000370473	9606.ENSP00000269571	0	0	0	0	0.084	0	0	0.45	0.474
RELA	EGFR	4447098	4436186	9606.ENSP00000384273	9606.ENSP00000275493	0	0	0	0	0	0	0	0.473	0.473
RASSF1	EGFR	4441940	4436186	9606.ENSP00000349547	9606.ENSP00000275493	0	0	0	0	0	0	0	0.473	0.473
IL6	F7	4447254	4444589	9606.ENSP00000385675	9606.ENSP00000364731	0	0	0	0	0	0	0	0.473	0.473
ESR1	CHEK2	4448358	4445704	9606.ENSP00000405330	9606.ENSP00000372023	0	0	0	0	0	0	0	0.473	0.473
CASP3	RASA1	4438651	4436131	9606.ENSP00000311032	9606.ENSP00000274376	0	0	0	0	0	0.379	0	0.186	0.472
MYC	BDNF	4451407	4448727	9606.ENSP00000479618	9606.ENSP00000414303	0	0	0	0	0	0	0	0.472	0.472
NFE2L2	NOS3	4446632	4437409	9606.ENSP00000380252	9606.ENSP00000297494	0	0	0	0	0	0	0	0.472	0.472
MYC	IRF1	4451407	4433930	9606.ENSP00000479618	9606.ENSP00000245414	0	0	0	0	0	0	0	0.472	0.472
CASP8	HSPB1	4442125	4434059	9606.ENSP00000351273	9606.ENSP00000248553	0	0	0	0	0	0.064	0	0.459	0.472
SLC2A4	CIDEA	4439402	4439342	9606.ENSP00000320935	9606.ENSP00000320209	0	0	0	0	0.062	0	0	0.46	0.472
UCP2	NOS3	4438746	4437409	9606.ENSP00000312029	9606.ENSP00000297494	0	0	0	0	0	0	0	0.471	0.471
PGR	CASP3	4439740	4438651	9606.ENSP00000325120	9606.ENSP00000311032	0	0	0	0	0	0.058	0	0.461	0.471
CASP3	CRP	4438651	4434405	9606.ENSP00000311032	9606.ENSP00000255030	0	0	0	0	0	0	0	0.471	0.471
HIF1A	NFE2L2	4449842	4446632	9606.ENSP00000437955	9606.ENSP00000380252	0	0	0	0	0.152	0	0	0.401	0.47
CHRM2	CHRNA2	4448086	4447196	9606.ENSP00000399745	9606.ENSP00000385026	0	0	0	0	0.063	0	0	0.454	0.467
ESR1	RAF1	4448358	4434195	9606.ENSP00000405330	9606.ENSP00000251849	0	0	0	0	0	0.085	0	0.442	0.467
PLAU	CCND1	4444017	4433391	9606.ENSP00000361850	9606.ENSP00000227507	0	0	0	0	0.11	0	0	0.425	0.466
CYP1B1	NR1I3	4451308	4442999	9606.ENSP00000478561	9606.ENSP00000356959	0	0	0	0	0.061	0.085	0	0.429	0.466
NFE2L2	CYP1A1	4446632	4445265	9606.ENSP00000380252	9606.ENSP00000369050	0	0	0	0	0	0	0	0.466	0.466
PRKCA	GSK3B	4448494	4439717	9606.ENSP00000408695	9606.ENSP00000324806	0	0	0	0.589	0	0.399	0	0.297	0.465
ICAM1	CCND1	4435501	4433391	9606.ENSP00000264832	9606.ENSP00000227507	0	0	0	0	0.061	0	0	0.453	0.465
UCP2	FABP1	4438746	4437198	9606.ENSP00000312029	9606.ENSP00000295834	0	0	0	0	0	0	0	0.464	0.464
VCAM1	EGFR	4437090	4436186	9606.ENSP00000294728	9606.ENSP00000275493	0	0	0	0	0.076	0	0	0.444	0.464
ERBB2	HSPB1	4435897	4434059	9606.ENSP00000269571	9606.ENSP00000248553	0	0	0	0	0.062	0	0	0.451	0.463
AR	PTGER3	4444436	4441881	9606.ENSP00000363822	9606.ENSP00000349003	0	0	0	0	0	0	0	0.463	0.463
MYC	ICAM1	4451407	4435501	9606.ENSP00000479618	9606.ENSP00000264832	0	0	0	0	0.052	0	0	0.457	0.463
CYP3A4	ACHE	4440831	4437943	9606.ENSP00000337915	9606.ENSP00000303211	0	0.003	0	0	0	0	0	0.462	0.462
IL6	PTGER3	4447254	4441881	9606.ENSP00000385675	9606.ENSP00000349003	0	0	0	0	0	0	0	0.46	0.46
IL6	UCP2	4447254	4438746	9606.ENSP00000385675	9606.ENSP00000312029	0	0	0	0	0	0	0	0.46	0.46
AR	CYP3A4	4444436	4440831	9606.ENSP00000363822	9606.ENSP00000337915	0	0	0	0	0	0.085	0	0.433	0.459
MYC	CTSD	4451407	4433665	9606.ENSP00000479618	9606.ENSP00000236671	0	0	0	0	0	0.104	0	0.422	0.459
CAV1	VCAM1	4440933	4437090	9606.ENSP00000339191	9606.ENSP00000294728	0	0	0	0	0.068	0	0	0.442	0.458
PTGS1	CAV1	4442503	4440933	9606.ENSP00000354612	9606.ENSP00000339191	0	0	0	0	0.062	0.379	0	0.145	0.458
ACACA	CAV1	4451758	4440933	9606.ENSP00000483300	9606.ENSP00000339191	0	0	0	0	0	0	0	0.457	0.457
NQO1	CCND1	4439310	4433391	9606.ENSP00000319788	9606.ENSP00000227507	0	0	0	0	0.133	0	0	0.4	0.457
RASA1	NFKBIA	4436131	4432983	9606.ENSP00000274376	9606.ENSP00000216797	0	0	0	0	0	0.432	0	0.083	0.457
GSTM1	AHR	4438694	4433805	9606.ENSP00000311469	9606.ENSP00000242057	0	0	0	0	0	0	0	0.456	0.456
MYC	PLAU	4451407	4444017	9606.ENSP00000479618	9606.ENSP00000361850	0	0	0	0	0.076	0.098	0	0.4	0.456
CYP1B1	CYP3A4	4451308	4440831	9606.ENSP00000478561	9606.ENSP00000337915	0	0	0.403	0.597	0.093	0	0	0.734	0.455
PLAU	VCAM1	4444017	4437090	9606.ENSP00000361850	9606.ENSP00000294728	0	0	0	0	0.062	0	0	0.443	0.455
CAV1	CASP3	4440933	4438651	9606.ENSP00000339191	9606.ENSP00000311032	0	0	0	0	0	0	0	0.454	0.454
CYP3A4	PON1	4440831	4433224	9606.ENSP00000337915	9606.ENSP00000222381	0	0	0	0	0.097	0	0	0.421	0.454
IL6	RASA1	4447254	4436131	9606.ENSP00000385675	9606.ENSP00000274376	0	0	0	0	0	0	0	0.453	0.453
HIF1A	HSF1	4449842	4449594	9606.ENSP00000437955	9606.ENSP00000431512	0	0	0	0	0	0.063	0	0.439	0.452
ERBB2	RAF1	4435897	4434195	9606.ENSP00000269571	9606.ENSP00000251849	0	0	0	0.578	0	0.219	0	0.717	0.452
PGR	CCNB1	4439740	4434484	9606.ENSP00000325120	9606.ENSP00000256442	0	0	0	0	0	0.05	0	0.446	0.451
ESR1	PLAU	4448358	4444017	9606.ENSP00000405330	9606.ENSP00000361850	0	0	0	0	0.061	0	0	0.44	0.451
IGF2	FOS	4447717	4438204	9606.ENSP00000391826	9606.ENSP00000306245	0	0	0	0	0	0	0	0.451	0.451
CYP3A4	EGFR	4440831	4436186	9606.ENSP00000337915	9606.ENSP00000275493	0	0	0	0	0	0	0	0.45	0.45
MGAM	CRP	4450229	4434405	9606.ENSP00000447378	9606.ENSP00000255030	0	0	0	0	0.049	0	0	0.446	0.45
NOS3	EGFR	4437409	4436186	9606.ENSP00000297494	9606.ENSP00000275493	0	0	0	0	0	0	0	0.45	0.45
CASP8	FOS	4442125	4438204	9606.ENSP00000351273	9606.ENSP00000306245	0	0	0	0	0.058	0	0	0.44	0.449
PGR	AHR	4439740	4433805	9606.ENSP00000325120	9606.ENSP00000242057	0	0	0	0	0	0.05	0	0.444	0.449
RUNX2	CASP3	4443746	4438651	9606.ENSP00000360493	9606.ENSP00000311032	0	0	0	0	0	0	0	0.448	0.448
ERBB2	RB1	4435897	4435747	9606.ENSP00000269571	9606.ENSP00000267163	0	0	0	0	0	0.054	0	0.441	0.448
FOS	ACHE	4438204	4437943	9606.ENSP00000306245	9606.ENSP00000303211	0	0	0	0	0	0	0	0.448	0.448
NQO1	AKR1B1	4439310	4436650	9606.ENSP00000319788	9606.ENSP00000285930	0.072	0	0	0	0.139	0	0	0.365	0.448
CIDEA	UCP2	4439342	4438746	9606.ENSP00000320209	9606.ENSP00000312029	0	0	0	0	0.063	0	0	0.435	0.448
INS	NQO1	4446661	4439310	9606.ENSP00000380432	9606.ENSP00000319788	0	0	0	0	0	0	0	0.448	0.448
POR	NR1I3	4449076	4442999	9606.ENSP00000419970	9606.ENSP00000356959	0	0	0	0	0	0.091	0	0.417	0.447
CYP3A4	NQO1	4440831	4439310	9606.ENSP00000337915	9606.ENSP00000319788	0	0	0	0	0	0	0	0.447	0.447
IGF2	SLC2A4	4447717	4439402	9606.ENSP00000391826	9606.ENSP00000320935	0	0	0	0	0.061	0.051	0	0.43	0.447
HIF1A	TP63	4449842	4435488	9606.ENSP00000437955	9606.ENSP00000264731	0	0	0	0	0	0.379	0	0.145	0.446
CASP3	ERBB3	4438651	4435741	9606.ENSP00000311032	9606.ENSP00000267101	0	0	0	0	0	0.05	0	0.441	0.446
VEGFA	CYP3A4	4451310	4440831	9606.ENSP00000478570	9606.ENSP00000337915	0	0	0	0	0	0	0	0.446	0.446
ALOX5	PTGER3	4444382	4441881	9606.ENSP00000363512	9606.ENSP00000349003	0	0	0	0	0	0	0	0.445	0.445
CAV1	SLC2A4	4440933	4439402	9606.ENSP00000339191	9606.ENSP00000320935	0	0	0	0	0	0	0	0.445	0.445
HSPB1	CCND1	4434059	4433391	9606.ENSP00000248553	9606.ENSP00000227507	0	0	0	0	0.088	0.133	0	0.355	0.445
AR	PARP1	4444436	4442743	9606.ENSP00000363822	9606.ENSP00000355759	0	0	0	0	0	0	0	0.445	0.445
NFE2L2	NR1I3	4446632	4442999	9606.ENSP00000380252	9606.ENSP00000356959	0	0	0	0	0	0	0	0.445	0.445
PLAU	CAV1	4444017	4440933	9606.ENSP00000361850	9606.ENSP00000339191	0	0	0	0	0.18	0	0	0.35	0.444
CYP1A1	AR	4445265	4444436	9606.ENSP00000369050	9606.ENSP00000363822	0	0	0	0	0	0.085	0	0.417	0.444
RELA	INS	4447098	4446661	9606.ENSP00000384273	9606.ENSP00000380432	0	0	0	0	0	0	0	0.444	0.444
MGAM	AKR1B1	4450229	4436650	9606.ENSP00000447378	9606.ENSP00000285930	0	0	0	0	0	0	0	0.443	0.443
HIF1A	FOS	4449842	4438204	9606.ENSP00000437955	9606.ENSP00000306245	0	0	0	0	0	0	0	0.443	0.443
RELA	GSK3B	4447098	4439717	9606.ENSP00000384273	9606.ENSP00000324806	0	0	0	0	0	0.294	0	0.244	0.443
NCOA1	CYP3A4	4447214	4440831	9606.ENSP00000385216	9606.ENSP00000337915	0	0	0	0	0	0	0	0.443	0.443
AR	HSPB1	4444436	4434059	9606.ENSP00000363822	9606.ENSP00000248553	0	0	0	0	0	0	0	0.443	0.443
IL6	PGR	4447254	4439740	9606.ENSP00000385675	9606.ENSP00000325120	0	0	0	0	0.062	0	0	0.43	0.442
PRKCA	BCL2	4448494	4446777	9606.ENSP00000408695	9606.ENSP00000381185	0	0	0	0	0	0.379	0	0.139	0.442
VEGFA	PTGS1	4451310	4442503	9606.ENSP00000478570	9606.ENSP00000354612	0	0	0	0	0.063	0	0	0.429	0.442
BCL2	RAF1	4446777	4434195	9606.ENSP00000381185	9606.ENSP00000251849	0	0	0	0	0	0.379	0	0.139	0.442
IGF2	RASSF1	4447717	4441940	9606.ENSP00000391826	9606.ENSP00000349547	0	0	0	0	0	0	0	0.441	0.441
NFE2L2	EGFR	4446632	4436186	9606.ENSP00000380252	9606.ENSP00000275493	0	0	0	0	0	0	0	0.44	0.44
CASP9	RAF1	4440164	4434195	9606.ENSP00000330237	9606.ENSP00000251849	0	0	0	0	0	0.064	0	0.427	0.44
VEGFA	NFE2L2	4451310	4446632	9606.ENSP00000478570	9606.ENSP00000380252	0	0	0	0	0	0	0	0.44	0.44
ESR1	BIRC5	4448358	4437778	9606.ENSP00000405330	9606.ENSP00000301633	0	0	0	0	0	0	0	0.44	0.44
PPARG	NFKBIA	4436745	4432983	9606.ENSP00000287820	9606.ENSP00000216797	0	0	0	0	0.061	0	0	0.428	0.439
MGAM	CASP3	4450229	4438651	9606.ENSP00000447378	9606.ENSP00000311032	0	0	0	0	0	0	0	0.439	0.439
VEGFA	HK2	4451310	4436875	9606.ENSP00000478570	9606.ENSP00000290573	0	0	0	0	0.076	0	0	0.417	0.438
IGF2	GSK3B	4447717	4439717	9606.ENSP00000391826	9606.ENSP00000324806	0	0	0	0	0	0.262	0	0.27	0.438
CYP1A1	PON1	4445265	4433224	9606.ENSP00000369050	9606.ENSP00000222381	0	0	0	0	0.055	0	0	0.428	0.436
RELA	NOS3	4447098	4437409	9606.ENSP00000384273	9606.ENSP00000297494	0	0	0	0	0	0.261	0	0.267	0.435
CASP9	NOS3	4440164	4437409	9606.ENSP00000330237	9606.ENSP00000297494	0	0	0	0	0	0	0	0.433	0.433
PLAU	ICAM1	4444017	4435501	9606.ENSP00000361850	9606.ENSP00000264832	0	0	0	0	0.098	0	0	0.398	0.433
BCL2	CCND1	4446777	4433391	9606.ENSP00000381185	9606.ENSP00000227507	0	0	0	0	0	0	0	0.433	0.433
VEGFA	SLC2A4	4451310	4439402	9606.ENSP00000478570	9606.ENSP00000320935	0	0	0	0	0.06	0	0	0.421	0.432
CYP1B1	PGR	4451308	4439740	9606.ENSP00000478561	9606.ENSP00000325120	0	0	0	0	0	0.085	0	0.403	0.431
ESR1	CRP	4448358	4434405	9606.ENSP00000405330	9606.ENSP00000255030	0	0	0	0	0.061	0.076	0	0.397	0.431
SELE	NFKBIA	4440292	4432983	9606.ENSP00000331736	9606.ENSP00000216797	0	0	0	0	0	0	0	0.43	0.43
ACACA	FABP1	4451758	4437198	9606.ENSP00000483300	9606.ENSP00000295834	0	0	0	0	0.061	0	0	0.416	0.429
FOS	NOS3	4438204	4437409	9606.ENSP00000306245	9606.ENSP00000297494	0	0	0	0	0	0	0	0.429	0.429
CASP8	ICAM1	4442125	4435501	9606.ENSP00000351273	9606.ENSP00000264832	0	0	0	0	0.063	0	0	0.416	0.429
SELE	CASP3	4440292	4438651	9606.ENSP00000331736	9606.ENSP00000311032	0	0	0	0	0	0	0	0.428	0.428
MYC	MGAM	4451407	4450229	9606.ENSP00000479618	9606.ENSP00000447378	0	0	0	0	0	0	0	0.426	0.426
ACACA	UCP2	4451758	4438746	9606.ENSP00000483300	9606.ENSP00000312029	0	0	0	0	0.049	0	0	0.422	0.426
CIDEA	LPL	4439342	4438536	9606.ENSP00000320209	9606.ENSP00000309757	0	0	0	0	0.085	0	0	0.398	0.426
AKR1B1	EGFR	4436650	4436186	9606.ENSP00000285930	9606.ENSP00000275493	0	0	0	0	0.231	0	0	0.285	0.426
RASSF1	PGR	4441940	4439740	9606.ENSP00000349547	9606.ENSP00000325120	0	0	0	0	0	0	0	0.426	0.426
CASP8	CTSD	4442125	4433665	9606.ENSP00000351273	9606.ENSP00000236671	0	0	0	0	0.052	0	0	0.42	0.426
COL3A1	VCAM1	4438049	4437090	9606.ENSP00000304408	9606.ENSP00000294728	0	0	0	0	0.222	0	0	0.292	0.425
CASP3	HK2	4438651	4436875	9606.ENSP00000311032	9606.ENSP00000290573	0	0	0	0	0	0.127	0	0.368	0.424
PTGS1	PPARG	4442503	4436745	9606.ENSP00000354612	9606.ENSP00000287820	0	0	0	0	0.059	0.05	0	0.407	0.423
VEGFA	NFKBIA	4451310	4432983	9606.ENSP00000478570	9606.ENSP00000216797	0	0	0	0	0	0	0	0.423	0.422
CHRM2	ADH1B	4448086	4438237	9606.ENSP00000399745	9606.ENSP00000306606	0	0	0	0	0	0	0	0.422	0.422
IGF2	AR	4447717	4444436	9606.ENSP00000391826	9606.ENSP00000363822	0	0	0	0	0	0	0	0.423	0.422
LPL	NOS3	4438536	4437409	9606.ENSP00000309757	9606.ENSP00000297494	0	0	0	0	0	0	0	0.423	0.422
PRKCA	ITGB2	4448494	4446737	9606.ENSP00000408695	9606.ENSP00000380948	0	0	0	0	0	0.365	0	0.125	0.42
IL6	CYP3A4	4447254	4440831	9606.ENSP00000385675	9606.ENSP00000337915	0	0	0	0	0	0	0	0.421	0.42
IGF2	CASP3	4447717	4438651	9606.ENSP00000391826	9606.ENSP00000311032	0	0	0	0	0	0	0	0.42	0.42
RUNX2	VCAM1	4443746	4437090	9606.ENSP00000360493	9606.ENSP00000294728	0	0	0	0	0	0	0	0.42	0.42
PLAU	FOS	4444017	4438204	9606.ENSP00000361850	9606.ENSP00000306245	0	0	0	0	0	0	0	0.42	0.42
ALOX5	PPARG	4444382	4436745	9606.ENSP00000363512	9606.ENSP00000287820	0	0	0	0	0	0	0	0.421	0.42
CYP3A4	PGR	4440831	4439740	9606.ENSP00000337915	9606.ENSP00000325120	0	0	0	0	0	0.085	0	0.391	0.419
FOS	HSPB1	4438204	4434059	9606.ENSP00000306245	9606.ENSP00000248553	0	0	0	0	0.061	0	0	0.406	0.419
RELA	CASP9	4447098	4440164	9606.ENSP00000384273	9606.ENSP00000330237	0	0	0	0	0	0	0	0.419	0.418
ERBB2	ICAM1	4435897	4435501	9606.ENSP00000269571	9606.ENSP00000264832	0	0	0	0	0	0	0	0.419	0.418
ERBB2	TP63	4435897	4435488	9606.ENSP00000269571	9606.ENSP00000264731	0	0	0	0	0	0	0	0.418	0.418
ACACA	HK2	4451758	4436875	9606.ENSP00000483300	9606.ENSP00000290573	0	0	0	0	0.064	0	0	0.402	0.416
ALOX5	CASP3	4444382	4438651	9606.ENSP00000363512	9606.ENSP00000311032	0	0	0	0	0	0	0	0.416	0.416
PLAU	PGR	4444017	4439740	9606.ENSP00000361850	9606.ENSP00000325120	0	0	0	0	0	0	0	0.416	0.416
INS	PLAU	4446661	4444017	9606.ENSP00000380432	9606.ENSP00000361850	0	0	0	0	0	0	0	0.417	0.416
IGFBP3	PLAU	4445494	4444017	9606.ENSP00000370473	9606.ENSP00000361850	0	0	0	0	0.098	0	0	0.378	0.415
CHEK2	ERBB2	4445704	4435897	9606.ENSP00000372023	9606.ENSP00000269571	0	0	0	0.551	0	0.242	0	0.528	0.414
CASP9	FOS	4440164	4438204	9606.ENSP00000330237	9606.ENSP00000306245	0	0	0	0	0	0	0	0.414	0.414
IGF2	PGR	4447717	4439740	9606.ENSP00000391826	9606.ENSP00000325120	0	0	0	0	0.066	0	0	0.399	0.414
AR	CCNB1	4444436	4434484	9606.ENSP00000363822	9606.ENSP00000256442	0	0	0	0	0	0.05	0	0.408	0.413
GSTP1	ERBB2	4446837	4435897	9606.ENSP00000381607	9606.ENSP00000269571	0	0	0	0	0.062	0	0	0.4	0.413
ADRA1A	ACHE	4445417	4437943	9606.ENSP00000369960	9606.ENSP00000303211	0	0	0	0	0	0	0	0.412	0.412
INS	NFKBIA	4446661	4432983	9606.ENSP00000380432	9606.ENSP00000216797	0	0	0	0	0	0	0	0.412	0.412
MYC	NQO1	4451407	4439310	9606.ENSP00000479618	9606.ENSP00000319788	0	0	0	0	0.065	0	0	0.397	0.412
IL6	COL3A1	4447254	4438049	9606.ENSP00000385675	9606.ENSP00000304408	0	0	0	0	0.063	0	0	0.398	0.411
LPL	VCAM1	4438536	4437090	9606.ENSP00000309757	9606.ENSP00000294728	0	0	0	0	0.061	0	0	0.399	0.411
ALOX5	ICAM1	4444382	4435501	9606.ENSP00000363512	9606.ENSP00000264832	0	0	0	0	0.06	0	0	0.4	0.411
VEGFA	GSK3B	4451310	4439717	9606.ENSP00000478570	9606.ENSP00000324806	0	0	0	0	0	0	0	0.411	0.411
IL6	ITGB2	4447254	4446737	9606.ENSP00000385675	9606.ENSP00000380948	0	0	0	0	0.054	0	0	0.403	0.411
VEGFA	RB1	4451310	4435747	9606.ENSP00000478570	9606.ENSP00000267163	0	0	0	0	0	0	0	0.411	0.41
ESR1	GSK3B	4448358	4439717	9606.ENSP00000405330	9606.ENSP00000324806	0	0	0	0	0	0.085	0	0.38	0.409
IGFBP3	COL3A1	4445494	4438049	9606.ENSP00000370473	9606.ENSP00000304408	0	0	0	0	0.227	0	0	0.266	0.408
ACACA	MGAM	4451758	4450229	9606.ENSP00000483300	9606.ENSP00000447378	0	0	0	0	0.114	0	0	0.36	0.408
NOS3	HSPB1	4437409	4434059	9606.ENSP00000297494	9606.ENSP00000248553	0	0	0	0	0.061	0.112	0	0.348	0.408
RASSF1	CASP3	4441940	4438651	9606.ENSP00000349547	9606.ENSP00000311032	0	0	0	0	0	0	0	0.407	0.407
UCP2	CASP3	4438746	4438651	9606.ENSP00000312029	9606.ENSP00000311032	0	0	0	0	0	0	0	0.405	0.405
CYP3A4	CRP	4440831	4434405	9606.ENSP00000337915	9606.ENSP00000255030	0	0	0	0	0.085	0	0	0.377	0.405
SLC2A2	LPL	4439612	4438536	9606.ENSP00000323568	9606.ENSP00000309757	0	0	0	0	0	0	0	0.404	0.404
CYP1A1	PGR	4445265	4439740	9606.ENSP00000369050	9606.ENSP00000325120	0	0	0	0	0.062	0.085	0	0.362	0.404
AHR	CCND1	4433805	4433391	9606.ENSP00000242057	9606.ENSP00000227507	0	0	0	0	0	0	0	0.403	0.403
CAV1	PGR	4440933	4439740	9606.ENSP00000339191	9606.ENSP00000325120	0	0	0	0	0	0.074	0	0.381	0.402
CYP3A4	SLC2A2	4440831	4439612	9606.ENSP00000337915	9606.ENSP00000323568	0	0	0	0	0.273	0.05	0	0.202	0.401
GSTP1	PON1	4446837	4433224	9606.ENSP00000381607	9606.ENSP00000222381	0	0	0	0	0.061	0	0	0.389	0.401
MYC	GSTP1	4451407	4446837	9606.ENSP00000479618	9606.ENSP00000381607	0	0	0	0	0	0	0	0.4	0.4
VEGFA	PARP1	4451310	4442743	9606.ENSP00000478570	9606.ENSP00000355759	0	0	0	0	0	0	0	0.4	0.4
IGFBP3	CASP3	4445494	4438651	9606.ENSP00000370473	9606.ENSP00000311032	0	0	0	0	0	0	0	0.4	0.4
CASP3	AKR1B1	4438651	4436650	9606.ENSP00000311032	9606.ENSP00000285930	0	0	0	0	0	0	0	0.4	0.4
BDNF	CASP9	4448727	4440164	9606.ENSP00000414303	9606.ENSP00000330237	0	0	0	0	0	0	0	0.4	0.4
ESR1	NQO1	4448358	4439310	9606.ENSP00000405330	9606.ENSP00000319788	0	0	0	0	0	0	0	0.401	0.4
IGF2	CTSD	4447717	4433665	9606.ENSP00000391826	9606.ENSP00000236671	0	0	0	0	0	0	0	0.4	0.4
BDNF	ADRA1A	4448727	4445417	9606.ENSP00000414303	9606.ENSP00000369960	0	0	0	0	0	0	0	0.4	0.4
NQO1	NOS3	4439310	4437409	9606.ENSP00000319788	9606.ENSP00000297494	0	0	0	0	0	0	0	0.4	0.4
